# Natural variation in stomata size contributes to the local adaptation of water-use efficiency in *Arabidopsis thaliana*

H. Dittberner<sup>1</sup>, A. Korte<sup>2</sup>, T. Mettler-Altmann<sup>3</sup>, A.P.M. Weber<sup>3</sup>, G. Monroe<sup>4</sup>, J. de Meaux<sup>1</sup>

Affiliations: <sup>1</sup>Institute of Botany, University of Cologne, 50674 Cologne; <sup>2</sup>Center for Computational and Theoretical Biology, Julius-Maximilians-University Würzburg, 97074 Würzburg; <sup>3</sup>Institute of Plant Biochemistry & CEPLAS Plant Metabolism and Metabolomics Laboratory, Heinrich-Heine-University Düsseldorf, 40225 Düsseldorf; <sup>4</sup>College of Agricultural Sciences, Colorado State University, Fort Collins, CO 80523-1101

## Abstract

Stomata control gas exchanges between the plant and the atmosphere. How natural variation in stomata size and density contributes to resolve trade-offs between carbon uptake and water-loss in response to local climatic variation is not yet understood. We developed an automated confocal microscopy approach to characterize natural genetic variation in stomatal patterning in 330 fully-sequenced *Arabidopsis thaliana* accessions collected throughout the European range of the species. We compared this to variation in water-use efficiency, measured as carbon isotope discrimination ( $\delta^{13}\text{C}$ ). We detect substantial genetic variation for stomata size and density segregating within *Arabidopsis thaliana*. A positive correlation between stomata size and  $\delta^{13}\text{C}$  further suggests that this variation has consequences on water-use efficiency. Genome-wide association analyses indicate a complex genetic architecture underlying not only variation in stomata patterning but also to its co-variation with carbon uptake parameters. Yet, we report two novel QTL affecting  $\delta^{13}\text{C}$  independently of stomata patterning. This suggests that, in *A. thaliana*, both morphological and physiological variants contribute to genetic variance in water-use efficiency. Patterns of regional differentiation and co-variation with climatic parameters indicate that natural selection has contributed to shape some of this variation, especially in Southern Sweden, where water availability is more limited in spring relative to summer. These conditions are expected to favor the evolution of drought avoidance mechanisms over drought escape strategies.

## Keywords

GWAS; stomata; water-use efficiency; *Arabidopsis thaliana*; Q<sub>ST</sub> F<sub>ST</sub> analysis; local adaptation to climate

## 1 Introduction

2 In plants, carbon uptake and water loss are intimately linked by a trade-off between growth  
3 and water conservation (Cowan, 1986; Cowan & Farquhar, 1977; Field, Merino, & Mooney,  
4 1983). Stomata, the microscopic pores embedded in the epidermis of plant leaves, play a key  
5 role in the resolution of this trade-off. Their density, distribution and regulation control the  
6 rate of CO<sub>2</sub> and water exchange (Raven, 2002). As a result, they impact the ratio of  
7 photosynthetic carbon assimilation to water loss *via* transpiration. This ratio defines water-use  
8 efficiency (WUE), a physiological parameter that directly determines plant productivity when  
9 the water supply is limited. Variation in density, distribution and regulation of stomata may  
10 thus have played a pivotal role in shaping the diversity of plant communities throughout the  
11 globe (Lambers, Chapin, & Pons, 1998; McDowell et al., 2008).

12  
13 The density of stomata on the leaf surface is expected to correlate positively with the rate of  
14 gas exchanges between the leaf and the atmosphere, also called “conductance”. Models based  
15 on gas diffusion theory predict that small stomata in high density can best maximize  
16 conductance (Franks & Beerling, 2009). A positive relationship between stomata density and  
17 conductance has been reported in a majority of studies looking at natural variation between  
18 species (Anderson & Briske, 1990; Pearce, Millard, Bray, & Rood, 2006) as well as within  
19 species (Carlson, Adams, & Holsinger, 2016; Muchow & Sinclair, 1989; Reich, 1984). Yet,  
20 higher stomata density does not always translate into higher rates of gas exchanges: in a  
21 diversity panel of rice (Ohsumi, Kanemura, Homma, Horie, & Shiraiwa, 2007) or within  
22 several vegetable crop species (Bakker, 1991), for example, the relationship was not  
23 observed.

24 Molecular mutants in genes promoting stomata development show that reduced stomata  
25 density translates into decreased water loss and increased ability to survive after exposure to  
26 drought (Franks, W. Doheny-Adams, Britton-Harper, & Gray, 2015; Yoo et al., 2010).  
27 Yet, decreased stomata density does not necessarily associate with increased demands on  
28 WUE imposed by water limitation. In the *Mimulus guttatus* species complex, accessions from  
29 drier inland populations showed decreased stomatal density and increased WUE, compared to  
30 accessions collected in humid coastal populations (Wu, Lowry, Nutter, & Willis, 2010). By  
31 contrast, in 19 *Protea repens* populations measured in a common garden experiment, stomata  
32 density increased with decreasing summer rainfall at the source location (Carlson et al.,  
33 2016).  
34 In fact, stomata density is not the only parameter modulating the balance between water loss  
35 and carbon uptake. Variation in stomata size also impacts the efficiency of stomata regulation  
36 (Raven, 2014). Stomata open and close in response to environmental and internal signals  
37 (Chater et al., 2011; Kinoshita et al., 2011). This ensures that plants do not desiccate when  
38 water evaporation is maximal and spares water when photosynthesis is not active  
39 (Daszkowska-Golec & Szarejko, 2013). The speed of stomata closure is higher in smaller  
40 stomata (Drake, Froend, & Franks, 2013; Raven, 2014). Stomatal responses are an order of  
41 magnitude slower than photosynthetic changes, so any increase in closure time lag may result  
42 in unnecessary water loss and reduce WUE (T. Lawson, Kramer, & Raines, 2012; Raven,  
43 2014). However, it is often observed that decreases in stomata size occur at the expense of  
44 increased stomata density (reviewed in Hetherington & Woodward, 2003). This leads to a  
45 correlation that may at first be counter-intuitive: an increase in stomata density can result in  
46 improved WUE because of indirect effects on stomata size. In *Eucalyptus globulus*, however,  
47 plants from the drier sites had smaller stomata and higher WUE but no concomitant change in

48 stomata density (Franks, Drake, & Beerling, 2009). This suggested that the developmental  
49 effect correlating stomata size and density may sometimes be alleviated. Altogether, these  
50 studies highlight interconnections between stomata size, stomata density and WUE that  
51 change across species or populations. How and whether variation in these traits and their  
52 connections support or constrain adaptive processes, however, is not clearly established.  
53 Eco-evolutionary studies, e.g. the analysis of evolutionary forces shaping genetic variation in  
54 natural populations, can determine whether phenotypic variance has a significant impact on  
55 the ecology of species (Carroll, Hendry, Reznick, & Fox, 2007; Hendry, 2016). By drawing  
56 on the elaborate toolbox of population genetics and genomics, it is not only possible to  
57 determine the genetic architecture of any given trait but also to ask whether it is optimized by  
58 natural selection and to investigate the ecological determinants of selective forces at work  
59 (Hendry, 2016; Weinig, Ewers, & Welch, 2014). In this effort, the annual species *Arabidopsis*  
60 *thaliana*, which thrives as a pioneer species in disturbed habitats, has a privileged position  
61 (Gaut, 2012). Genome-wide patterns of nucleotide variation can be contrasted to phenotypic  
62 variation and both the genetic architecture and the adaptive history of the traits can be  
63 reconstructed (Atwell et al., 2010; Fournier-Level et al., 2011; Alonso-Blanco et al., 2016).  
64 Environmental variation has a documented impact on local adaptation in this species (Debieu  
65 et al., 2013; Hamilton, Okada, Korves, & Schmitt, 2015; Hancock et al., 2011; Kronholm,  
66 Picó, Alonso-Blanco, Goudet, & Meaux, 2012; Lasky et al., 2014; Postma & Ågren, 2016). In  
67 addition, natural variation in stomatal patterning is known to segregate among *A. thaliana*  
68 accessions (Delgado, Alonso-Blanco, Fenoll, & Mena, 2011). This species thus provides the  
69 ideal evolutionary context in which the adaptive contribution of variation in stomata  
70 patterning can be dissected.

71 Here, we developed an automated confocal microscopy approach that overcomes the technical  
72 limitations which have so far complicated the phenotyping of stomatal variation on larger  
73 samples. We characterized genetic variation in stomatal patterning in 330 fully-sequenced  
74 accessions, across a North-South transect of the European range. Additionally, we measured  
75  $\delta^{13}\text{C}$ , a commonly used estimate of water-use efficiency (WUE) (Juenger et al., 2005; Martin  
76 & Thorstenson, 1988; McKay et al., 2008; Mojica et al., 2016), for all genotypes. Combined  
77 with public genomic and environmental resources, this dataset allows us to ask: i) how  
78 variable are natural *A. thaliana* accessions in stomata patterning? ii) does variation in stomata  
79 patterning influence the carbon-water trade-off? iii) what is the genetic architecture of traits  
80 describing stomata patterning? iv) is stomata patterning optimized by natural selection?  
81 By combining a genome-wide association approach with  $Q_{\text{ST}}/F_{\text{ST}}$  analyses and associations  
82 with environmental parameters, we show that, in *A. thaliana*, variation in stomata patterning  
83 plays a role in local adaptation. Our results further indicate that natural variation in stomata  
84 size is one of the adaptive traits contributing to the optimization of WUE.

## 85 Methods

### 86 Plant material, plant genotypes and growth conditions

87 In total, 330 accessions, spanning a wide geographical range were selected from the 1001  
88 collection of fully sequenced genotypes (Suppl. Table 1). Accessions were assigned to five  
89 groups based on their geographic origin and genetic clustering (Alonso-Blanco et al., 2016):  
90 Spain, Western Europe, Central Europe, Southern Sweden and Northern Sweden (Figure S1).  
91 In 20 cases, for which genetic information contradicted geographic information, we  
92 prioritized geographic information since we are focusing on local adaptation and expect that  
93 geography, as opposed to demographic history, reflects the scale at which local adaptation

94 proceeds. To avoid oversampling, we randomly reduced the number of plants sampled at the  
95 same location to one for the analysis of heritability, regional differentiation ( $Q_{ST}$ - $F_{ST}$ ) and  
96 climatic correlation, resulting in 287 accessions.

97 The genome sequences of the 330 genotypes included in the analysis were downloaded from  
98 the 1001 genome database (Alonso-Blanco et al., 2016) on May 12th, 2017. Single nucleotide  
99 polymorphism (SNP) data was extracted using *vcftools* (Danecek et al., 2011). Genomic data  
100 was thinned to 1 SNP picked randomly in each 1000bp window to reduce computational load.  
101 In *A. thaliana*, linkage disequilibrium extends beyond 1kb (Nordborg et al., 2002). Thus, this  
102 data-size reduction should not impact statistics describing the geographical structure of  
103 genomic variation. Additionally, minimum minor allele frequency was set to 5% and sites  
104 exceeding 5% missing data were removed, resulting in 70,410 SNPs among all genotypes.  
105 SNP information was loaded into R using the *vcfR* package (Knaus, Grunwald, Anderson,  
106 Winter, & Kamvar, 2017). For genome-wide association studies the full, unthinned SNP  
107 dataset was used and missing SNPs were imputed using BEAGLE version 3.0 (Browning &  
108 Browning, 2009).

109 Seeds were stratified on wet paper for 6 days at 4°C in darkness. Plants were grown on soil in  
110 5x5 cm paper pots in 3 replicates with one plant per pot. Genotypes were randomized within  
111 each of 3 blocks of 12 trays containing 8x4 pots. Plants were grown for 7 weeks in growth  
112 chambers (one per block) under the following conditions: 16 h light; 95  $\mu\text{mol s}^{-1} \text{mm}^{-2}$  light  
113 intensity; 20 °C day- and 18 °C night-temperature. Plants were watered twice a week and  
114 trays shuffled and rotated every two to three days to account for variable conditions within the  
115 chambers.

116

117

## 118 High throughput phenotyping

119 After 7 weeks, one fully-expanded, intact, adult leaf (one of the largest leaves developed after  
120 leaf 4) was selected from each plant for microscopic analysis. Stomata density and size as  
121 well as leaf size were measured using our high-throughput microscopy pipeline (for details,  
122 see Suppl. Document 1). Stomata density was also determined manually on a random set of  
123 14 individuals and on a set of 32 independently-grown individuals. Automatic and manual  
124 measurements were strongly correlated (Pearson correlation coefficient  $r^2=0.88$ ,  $p<<0.01$  and  
125  $r^2=0.81$ ,  $p<<0.01$ , for the 14 and 32 individuals Figures S2-3). The algorithm was  
126 conservative and tended to slightly under-estimate stomata numbers, resulting in a low false-  
127 positive rate. This ensured that stomata area was generally quantified on objects that  
128 corresponded to real stomata. Due to quality filters in our pipeline, the number of analyzed  
129 images differed between samples (Figure S4). We found a significant correlation between the  
130 number of images analyzed and stomata density ( $r=0.21$ ,  $p<<0.01$ , Figure S5), but not stomata  
131 size ( $r=0.02$ ,  $p>0.05$ ). Thus, we included the number of images as a co-factor into all  
132 statistical models for stomata density (see below). Carbon isotope discrimination  
133 measurements ( $\delta^{13}\text{C}$ ) of whole rosettes were performed for all plants in block 1 (for details  
134 see Suppl. Document 1).

135

## 136 Heritability estimates

137 Broad-sense heritability  $H^2$ , the proportion of the observed phenotypic variance that is  
138 genetic, was estimated as:

$$139 \quad H^2 = \text{Var}G / (\text{Var}G + \text{Var}E)$$

140 where  $\text{Var}G$  is the genetic variance and  $\text{Var}E$  is the environmental variance. Because we  
141 worked with inbred lines,  $\text{Var}E$  and  $\text{Var}G$  could be estimated as the variance between

142 replicates of a genotype and the variance between genotypes, respectively, with a linear-  
143 mixed-model using block as fixed effect and genotype as random effect. We ran a linear  
144 mixed model using the *lme* function from *nlme* package (Pinheiro, Bates, DebRoy, Sarkar, &  
145 R Core Team, 2015) (Suppl. Document 2). For  $\delta^{13}\text{C}$ , no replicates were available but a  
146 pseudo-heritability estimate was extracted from the GWAS mixed model including the  
147 kinship matrix (Atwell et al., 2010).

148

149

## 150 Genome-Wide Association Study (GWAS)

151 For GWAS, SNPs with minor allele count <5 were removed, leaving a dataset of 2.8-3M  
152 SNPs, depending on missing data for the phenotypes. Minor allele frequency spectra for all  
153 three datasets show that the subset of 261 genotypes, for which all three phenotypes were  
154 determined, has a lower proportion of rare SNPs (Figure S6). GWAS was performed with a  
155 mixed model correcting for population structure using a kinship matrix calculated under the  
156 assumption of the infinitesimal model. SNPs were first analyzed with a fast approximation  
157 (Kang et al., 2010) and the 1000 top-most associated SNPs were reanalyzed with the complete  
158 model that estimates the respective variance components for each SNP separately (Kang et al.,  
159 2008).

160 For trait pairs measured on the same plant, a Multi-Trait Mixed Model (MTMM) was applied  
161 to distinguish common and trait-specific SNP-phenotype association (Korte et al., 2012).

162 The MTMM performs three different statistical tests on a bivariate phenotype including each  
163 trait pair. The first model tests whether a given SNP has the same effect on both traits. This

164 model has increased power to detect significant associations, which may fall under the

165 significance threshold when traits are analyzed in isolation. The second model identifies SNPs



166 having distinct effects on the two traits. It is well suited to detect SNPs with antagonistic  
167 effects on both traits. The last model combines both trait-specific and common effects. This  
168 last model is particularly powerful for detecting markers affecting both traits with different  
169 intensity. The MTMM analysis also provides estimates of the genetic and environmental  
170 correlation for each pair of traits. The statistical details of the models are described in (Korte  
171 et al., 2012).

172 For all analyses (GWAS and MTMM), the significance threshold for QTL identification was  
173 determined as a 5 % Bonferroni threshold, i.e. 0.05 divided by the number of SNPs in the  
174 dataset.

175

176

#### 177 Climatic data

178 Climatic data included average precipitation, temperature, water vapor pressure (humidity),  
179 wind speed and solar radiation estimates with 2.5 min grid resolution (WorldClim2 database  
180 (Fick & Hijmans, 2017) on May 30<sup>th</sup>, 2017) and soil water content (Trabucco & Zomer,  
181 2010). For each variable and accession, we extracted a mean over the putative growing  
182 season, i.e. the months in the year with average temperature greater than 5 °C and average soil  
183 water content over 25% (Suppl. Table 1). We further computed historical drought frequencies  
184 at *A. thaliana* collection sites using 30+ years of the remotely-sensed Vegetative Health Index  
185 (VHI). The VHI is a drought detection method that combines the satellite measured  
186 Vegetative Health and Thermal Condition Indices to identify drought induced vegetative  
187 stress globally at weekly 4km<sup>2</sup> resolution (Kogan, 1995). This is a validated method for  
188 detecting drought conditions in agriculture. Specifically, we used VHI records to calculate the  
189 historic frequency of observing drought conditions (VHI<40) during the spring (quarter

190 surrounding spring equinox) and summer (quarter surrounding summer solstice). These are  
191 the typical reproductive seasons of *Arabidopsis* populations (reviewed in Burghardt, Metcalf,  
192 Wilczek, Schmitt, & Donohue, 2015). The drought regime in each location was quantified as  
193 the log-transformed ratio of spring over summer drought frequency. Positive values of this  
194 drought regime measure reflect environments where the frequency of drought decreases over  
195 the typical reproductive growing season, and vice versa for negative values. This ratio  
196 quantifies the seasonality of water availability. It correlates with the ratio of soil water content  
197 of the first and third month of the reproductive season ( $r=0.54$ ,  $p<0.01$ ), which we defined as  
198 the first and third growing month in the year, giving similar estimates as Burghardt, Metcalf,  
199 Wilczek, Schmitt, & Donohue (2015).

200 Because the seven climate variables are correlated, we combined them in seven principal  
201 components (PCs) for 316 *A. thaliana* collection sites (Figures S7-9, loadings described in  
202 Suppl. Document 2). Fourteen genotypes with missing climate data were excluded. Climatic  
203 distance between each region pair was estimated as the F-statistic of a multivariate analysis of  
204 variance (MANOVA) with climatic PCs as response variables and region of origin as  
205 predictor.

206

207

## 208 Population genomic analysis

209 Principal component analysis (PCA) of genomic data (thinned to 1kb) was done using the  
210 *adeigenet* package (Jombart et al., 2016) with missing data converted to the mean (Figures  
211 S10-11).

212 Comparing phenotypic differentiation ( $Q_{ST}$ ) to the distribution of  $F_{ST}$  is a useful method to  
213 reveal signatures of local adaptation (Leinonen, McCairns, O'hara, & Merilä, 2013; Whitlock

214 & Guillaume, 2009). Genome-wide, pairwise  $F_{ST}$  estimates between regions were calculated  
215 using the *hierfstat* package (function *basic.stats*, Nei's  $F_{ST}$ ) (Goudet, 2005). Negative  $F_{ST}$   
216 values were set to zero before the 95th percentile was calculated.

217 For stomata density, stomata size and WUE, the respective phenotypic differentiation  
218 between regions,  $Q_{ST}$ , was estimated as:

$$219 \quad Q_{ST} = \text{Var}B / (\text{Var}W + \text{Var}B)$$

220 where  $\text{Var}W$  is the genetic variance within regions and  $\text{Var}B$  the genetic variance between  
221 regions as described in Kronholm et al. (2012) (for details, see Suppl. Document 1).

222 To test whether  $Q_{ST}$  estimates significantly exceed the 95<sup>th</sup> percentile of the  $F_{ST}$  distribution,  
223 we permuted the phenotypic data by randomizing genotype labels to keep heritability  
224 constant. For each permutation and phenotype, we calculated the difference between each  $Q_{ST}$   
225 value and the 95<sup>th</sup> percentile of the  $F_{ST}$  distribution. We used the 95th percentile of the  
226 maximum  $Q_{ST}$ - $F_{ST}$  distance distribution as a threshold for determining if phenotypic  
227 differentiation significantly exceeds neutral expectations. Since this test takes the maximum  
228  $Q_{ST}$ - $F_{ST}$  distance for all population combinations in each permutation, it does not require  
229 multiple testing correction.

230

231

## 232 **Statistical analysis**

233 Statistical analysis was conducted using R (R Development Core Team, 2008) (R Markdown  
234 documentation in Suppl. Document 2). Plots were created using the following libraries:

235 *ggplot2* (Wickham, 2009), *ggthemes* (Arnold et al., 2017), *ggmap* (Kahle & Wickham, 2013),

236 *ggbiplot* (Vu, 2011) and *effects* (Fox et al., 2016).

237 We used Generalized Linear Models (GLM) to test the effect of block, origin, pot position in  
238 tray (edge or center) and leaf size on each phenotype (stomata density, stomata size and  $\delta^{13}\text{C}$ ).  
239 For stomata density we also included the number of analyzed images as a co-factor. The error  
240 distribution was a quasi-Poisson distribution for stomata density and size and Gaussian for  
241  $\delta^{13}\text{C}$ . Stomata density was log-transformed to avoid over-dispersion. Significance of each  
242 predictor was determined via a type-II likelihood-ratio test (*Anova* function of the *car*  
243 package). Significant differences between regions were based on GLMs including only  
244 significant predictor variables and determined with Tukey's contrasts using the *glht* function  
245 of the *multcomp* package (Hothorn et al., 2017). GLMs were also used to test the impact of all  
246 climatic PCs on phenotypic traits, while accounting for population structure with the first 20  
247 PCs for genetic variation, which explain 28% of genetic variation (see above). Additionally,  
248 for  $\delta^{13}\text{C}$  we also tested a simpler model including climatic parameters but not population  
249 structure. From the resulting models, we created effect plots for significant environmental  
250 PCs using the *effects* package (Fox et al., 2016). Further, we used GLMs with binomial  
251 distribution to test whether any of the climatic PCs significantly predicts the allelic states of  
252 loci associated with WUE in GWAS.

253

254

## 255 Results

### 256 Substantial genetic variation in stomata density and size

257 We analyzed over 31,000 images collected in leaves of 330 *A. thaliana* genotypes and  
258 observed high levels of genetic variation in stomata patterning. Genotypic means ranged from  
259 87 to 204 stomata/mm<sup>2</sup> for stomata density and from 95.0  $\mu\text{m}^2$  to 135.1  $\mu\text{m}^2$  for stomata size

260 (see Suppl. Table 2 for raw phenotypic data). Leaf size was not significantly correlated with  
261 stomata density ( $r=-0.02$ ,  $p=0.7$ , Figure S12) and stomata size ( $r=-0.08$ ,  $p=0.15$ , Figure S13),  
262 as expected in fully developed leaves. Broad-sense heritability reached 0.41 and 0.30 for  
263 stomata size and density, respectively. Mean stomata density and stomata size were  
264 negatively correlated ( $r=-0.51$ ,  $p<<0.001$ ; Figure 1). Due to the strong correlation between  
265 stomata size and density, we focus primarily on stomata size in the following report, but  
266 results for stomata density are in the supplemental material.

267

268

#### 269 Stomata size correlates with water-use efficiency

270 We expected variation in stomatal traits to influence the trade-off between carbon uptake and  
271 transpiration. Thus, we measured isotopic carbon discrimination,  $\delta^{13}\text{C}$ , an estimator that  
272 increases with water-use efficiency (WUE) (Farquhar, Hubick, Condon, & Richards, 1989;  
273 McKay et al., 2008).  $\delta^{13}\text{C}$  ranged from  $-38.7\text{‰}$  to  $-30.8\text{‰}$  (Suppl. Table 2) and was  
274 significantly correlated with stomata size ( $r=-0.18$ ,  $p=0.004$ ; Figure 2), indicating that  
275 accessions with smaller stomata have higher WUE. About  $\sim 4\%$  of the total phenotypic  
276 variation (i.e. the sum of phenotypic and genetic variance) in  $\delta^{13}\text{C}$  is explained by genetic  
277 variance in stomata size. We found no significant correlation between stomatal density and  
278  $\delta^{13}\text{C}$  ( $r=-0.007$ ,  $p=0.9$ , Figure S14).

279

280

#### 281 Common genetic basis of stomata size and $\delta^{13}\text{C}$

282 To identify the genetic basis of the phenotypic variance we observe, we conducted a genome-  
283 wide association study (GWAS) for each phenotype. We calculated for each phenotype a

284 pseudo-heritability, which is the fraction of phenotypic variance explained by the empirically  
285 estimated relatedness matrix (e.g. kinship matrix computed on genome-wide SNP typing).  
286 Pseudo-heritability estimates were 0.59 for stomata density, 0.56 for stomata size and 0.69 for  
287  $\delta^{13}\text{C}$ , indicating that differences in stomata patterning and carbon physiology decreased with  
288 increasing relatedness. Despite considerable levels of heritability, we did not detect any  
289 variant associating with stomata density at a significance above the Bonferroni-corrected p-  
290 value of 0.05 ( $\log_{10}(p)=7.78$ ). For stomata size, we detected one QTL with two SNPs  
291 significantly associating at positions 8567936 and 8568437 (Figure S15). These SNPs have an  
292 allele frequency of 1.5% (5 counts) and 2.1% (7 counts), respectively and map to gene  
293 *AT4G14990.1*, which encodes for a protein annotated with a function in cell differentiation.  
294 The former SNP is a synonymous coding mutation while the latter is in an intron.  
295  
296 For  $\delta^{13}\text{C}$ , one genomic region on chromosome 2 position 15094310 exceeded the Bonferroni  
297 significance threshold ( $\log_{10}(p)=7.97$ , Figure S16). Allele frequency at this SNP was 9.7% (30  
298 counts) and all accessions carrying this allele, except four, were from Southern Sweden (3  
299 Northern Sweden, 1 Central Europe). Southern Swedish lines carrying the allele showed  
300 significantly increased  $\delta^{13}\text{C}$  compared to the remaining Southern Swedish lines ( $W=1868$ , p-  
301 value= $6.569\text{e-}05$ , Figure S17). A candidate causal mutation is a non-synonymous SNP at  
302 position 15109013 in gene *AT2G35970.1*, which codes for a protein belonging to the Late  
303 Embryogenesis Abundant (LEA) Hydroxyproline-Rich Glycoprotein family. This SNP also  
304 shows elevated association with the phenotype. However, its significance was below the  
305 Bonferroni-threshold ( $\log(p)=7$ ). Since this SNP is not in linkage disequilibrium with the  
306 highest associating SNP in the region (Figure S18), it is possible that another, independent  
307 SNP in this region is causing the association.

308

309 We used Multi-Trait Mixed-Model (MTMM) analysis to disentangle genetic and  
310 environmental determinants of the phenotypic correlations. We found that the significant  
311 correlation between stomata density and stomata size ( $r=-0.5$ ) had no genetic basis, but had a  
312 significant ( $r=-0.9$ ,  $p<0.05$ ) residual correlation. This suggests that the correlation was not  
313 determined by common loci controlling the two traits, but by other, perhaps physical,  
314 constraints or by epistatic alleles at distinct loci. By contrast, the correlation between stomata  
315 size and  $\delta^{13}\text{C}$  ( $r= -0.18$ ) had a significant genetic basis (kinship-based correlation,  $r=-0.58$ ,  
316  $p<0.05$ ). Thus, in contrast to the phenotypic variation, genetic variation in stomata size  
317 roughly explains over 33% of the genetic variation in  $\delta^{13}\text{C}$ .

318

319 To further investigate the genetic basis for the correlation between stomata size and  $\delta^{13}\text{C}$ , we  
320 performed MTMM GWAS, which tests three models: the first model tests whether a SNP has  
321 the same effect on both traits; the second model tests whether a SNP has differing effects on  
322 both traits and the third model is a combination of the first two to identify SNPs which have  
323 effects of different magnitude on the traits (Korte et al., 2012). We did not observe variants  
324 with same or differing effects on  $\delta^{13}\text{C}$  and stomata size. However, with the combined model,  
325 we observed a marginally significant association on chromosome 4, which had an effect on  
326  $\delta^{13}\text{C}$  but not stomata size. GWAS of  $\delta^{13}\text{C}$  restricted to the 261 individuals used for the  
327 MTMM analysis confirmed the QTL on chromosome 4. GWAS applied to different but  
328 overlapping sets of accessions yield similar results but can sometimes differ in the set of  
329 significant associations, since marginal changes in SNP frequency can affect significance  
330 levels (Figure S6). Indeed, the p-values of associations with  $\delta^{13}\text{C}$  for the two datasets (310  
331 and 261 accessions) are highly correlated ( $r=0.87$ ,  $p<<0.0001$ , Figure S19). In this set of

332 genotypes, two SNPS, at position 7083610 and 7083612, exceeded the Bonferroni-corrected  
333 significance threshold ( $\alpha=0.05$ ) (both  $p=4.8e-09$ , Figure S20) although they were under the  
334 significance threshold in the larger dataset. Allele frequency is 14% (37 counts) at these two  
335 loci and explains 11% of the phenotypic variation. The association is probably due to  
336 complex haplotype differences since it coincides with a polymorphic deletion and contains  
337 several imputed SNPs. Thirty-five of the 37 accessions carrying the minor allele originated  
338 from Southern Sweden and showed significantly higher  $\delta^{13}\text{C}$  compared to other Southern  
339 Swedish accessions (mean difference=1.34;  $W=1707$ ,  $p=1.15e-06$ ; Figure S21). In summary,  
340 we detected two genetic variants significantly associating with  $\delta^{13}\text{C}$ , independent of stomata  
341 size, despite the common genetic basis of the two traits.

342

343

#### 344 [Stomata size and stomata density correlate with geographical patterns of climatic](#) 345 [variation](#)

346 We used PCA to describe multivariate variation in climatic conditions reported for the  
347 locations of origins of the genotypes. We tested the correlation of each measured phenotype  
348 with climatic principal components (PCs) using a GLM which accounted for genetic  
349 population structure (see methods). We found a significant, negative relationship between  
350 genetic variation in stomata size and climatic PC2 (Likelihood ratio test Chi-Square (LRT  $X^2$ )  
351 =9.2784, degrees of freedom (df)=1,  $p=0.005$ ) and PC5 (LRT  $X^2=5.7335$ , df=1,  $p=0.02$ ,  
352 Figure 3). Climatic PC 2 explained 23.8% of climatic variation and had the strongest loadings  
353 (both negative) from temperature and water vapor pressure (humidity). Climatic PC 5  
354 explained 9% of the climatic variation and mostly increased with increasing spring-summer  
355 drought probability ratio and increasing solar radiation. We also found significant climatic



356 predictors for the distribution of genetic variation in stomata density (PC 2: LRT  $X^2=8.6612$ ,  
357  $df=1$   $p=0.003$ ; PC 5: LRT  $X^2=7.3773$ ,  $df=1$ ,  $p=0.007$ ; PC 7: LRT  $X^2=6.6033$ ,  $df=1$ ,  $p=0.01$ ;  
358 Figure S22).  $\delta^{13}C$  did not correlate with any of the climatic PCs. However, removing  
359 population structure covariates from the model revealed significant correlations of  $\delta^{13}C$  with  
360 climatic PC2 (+, LRT  $X^2=7.3564$ ,  $df=1$ ,  $p=0.006$ ), PC3 (-, LRT  $X^2=3.8889$ ,  $df=1$ ,  $p=0.048$ )  
361 and PC4 (+, LRT  $X^2=6.6885$ ,  $df=1$ ,  $p=0.009$ ) (Figure S23). PC3 explained 13.7% of climatic  
362 variation and principally increased with rainfall and decreased with spring-summer drought  
363 probability ratio. PC4 explained 11.4% of the total variation and mostly increased with wind  
364 speed. Therefore, the covariation of  $\delta^{13}C$  with climatic parameters describing variation in  
365 water availability and evaporation in *A. thaliana* is strong but confounded with the  
366 demographic history of the species. To test whether alleles associating with increased  $\delta^{13}C$  in  
367 GWAS are involved in adaptation to local climate, we checked whether any climatic PC is a  
368 significant predictor of the allelic state of Southern Swedish accessions. However, none of the  
369 climatic PCs was a significant predictor for one of the two loci.

370

371

## 372 **Patterns of regional differentiation depart from neutral expectations**

373 Genotypes were divided into five regions based on genetic clustering (Alonso-Blanco et al.,  
374 2016) and their geographic origin (Figure S1, see Methods). We detected significant  
375 phenotypic differentiation among these regions for stomata size (LRT  $X^2=52.852$ ,  $df=4$ ,  
376  $p=9.151e-11$ , Figure 4). Stomata size was significantly lower in Southern Sweden (mean=108  
377  $\mu m^2$ ) compared to Central Europe (mean=114 $\mu m^2$ , Generalized Linear Hypothesis Test  
378 (GLHT)  $z=-6.24$ ,  $p<0.001$ ), Western Europe (mean=111  $\mu m^2$ , GLHT  $z=2.769$ ,  $p=0.04$ ) and  
379 Spain (mean=113  $\mu m^2$ , GLHT  $z=6.709$ ,  $p<0.001$ ), which did not significantly differ from

380 each other. Northern Sweden showed an intermediate phenotype and did not differ  
381 significantly from any region (mean=110  $\mu\text{m}^2$ ). Variation for stomata density, showed a  
382 similar but inverted pattern (Figure S24).

383

384 Furthermore, we found significant regional differentiation in  $\delta^{13}\text{C}$  measurements (LR  $X^2$   
385 =58.029, df=4 p=7.525e-12, Figure 4). Highest  $\delta^{13}\text{C}$  levels (highest WUE) were found in  
386 accessions from Northern Sweden (mean=-34.8) and Southern Sweden (mean=-35.2), which  
387 were significantly higher than in accessions from Spain (mean=-35.7; GLHT Southern  
388 Sweden  $z=-3.472$ ,  $p=0.008$ ; GLHT North Sweden  $z=-3.49$ ,  $p=0.001$ ) and Western Europe  
389 (mean=-36.06; GLHT Southern Sweden  $z=-2.8$ ,  $p=0.03$ ; GLHT Northern Sweden  $z=-3.28$ ,  
390  $p=0.008$ ). Lowest  $\delta^{13}\text{C}$  levels were found in lines from Central Europe (mean=-36.6), which  
391 were significantly lower than in lines from Northern Sweden (GLHT  $z=5.676$ ,  $p<0.001$ ),  
392 Southern Sweden (GLHT  $z=6.992$ ,  $p<0.001$ ) and Spain (GLHT  $z=3.714$ ,  $p=0.002$ ).

393

394

395 The observed regional differences result either from the demographic history of the regions or  
396 from the action of local selective forces. To tease these possibilities apart, the phenotypic  
397 differentiation ( $Q_{ST}$ ) can be compared to nucleotide differentiation ( $F_{ST}$ ) (Kronholm et al.,  
398 2012; Leinonen et al., 2013). We examined each pair of regions separately, since they are not  
399 equidistant from each other and calculated  $F_{ST}$  distributions for over 70,000 SNP markers  
400 (spaced at least 1kb apart, see methods). For each trait,  $Q_{ST}$  exceeded the 95<sup>th</sup> percentile of the  
401  $F_{ST}$  distribution in at least two pairs of regions (Table 1 A-C). We used permutations to  
402 calculate a significance threshold for the  $Q_{ST}/F_{ST}$  difference (see methods). Significant  
403 regional differentiation was pervasive in our sample, with Central Europe and Southern

404 Sweden being significantly differentiated for all three phenotypes. This analysis suggests that  
405 natural selection has contributed to shape the phenotypic differentiation between regions.

406

407

408 Regional differences in climate may have imposed divergence in stomatal patterning. Thus,  
409 we estimated climatic distances between regions using estimates of regional effects extracted  
410 from a MANOVA. We did not observe significant correlations between adaptive phenotypic  
411 divergence ( $Q_{ST}-F_{ST}$ ) and the climatic distance of the respective regions (Mantel test  $p>0.05$   
412 for each of the three traits). Regional divergence in  $\delta C^{13}$ , stomata density and stomata size  
413 was therefore not proportional to climatic divergence.

414

415

## 416 Discussion

### 417 Genetic variation for stomata density and size segregates in *A. thaliana*

418 We used high-throughput confocal imaging to characterize stomata patterning in over 31,000  
419 images from 870 samples collected from 330 genotypes. Our high-throughput pipeline could  
420 characterize stomata density and stomata size with a reliable accuracy, confirmed by high  
421 correlation with manual measurements. Broad-sense heritability and pseudo-heritability  
422 estimates for stomata density, which are 30% and 58%, respectively, are slightly lower than in  
423 a previous report of manually counted stomata diversity across a smaller sample chosen to  
424 maximize genetic diversity (Delgado et al., 2011). Despite the clear impact of environmental  
425 (random) variance on both observed phenotypes, stomata size and stomata density showed a  
426 strong negative correlation. This is consistent with earlier reports of studies manipulating

427 regulators of stomata development (Doheny-Adams, Hunt, Franks, Beerling, & Gray, 2012;  
428 Franks et al., 2015), but also with studies analyzing stomatal trait variation in a wide range of  
429 species (Franks & Beerling, 2009; Hetherington & Woodward, 2003).

430

431 The extensive genomic resources available in *A. thaliana* enabled us to investigate the genetic  
432 basis of trait variation and co-variation, with the help of GWAS (Atwell et al., 2010). Much is  
433 known about the molecular pathways that control the differentiation of stomata in *Arabidopsis*  
434 *thaliana*, providing a set of candidate genes expected to control genetic variation in stomata  
435 patterning (Bergmann & Sack, 2007; Pillitteri & Torii, 2012). However, we did not detect any  
436 genomic region that associated with stomata density at a p-value beyond the Bonferroni-  
437 significance threshold. For stomata size, there was only one significant association on  
438 chromosome 4, albeit with very low minor allele frequency in a gene that has not been  
439 reported previously in stomata development. GWAS studies can detect small-effect loci only  
440 if they segregate at high frequency, whereas rare alleles only give detectable signals when  
441 they are of large effect (Korte & Farlow, 2013; Wood et al., 2014). Given that variance for  
442 both stomata size and stomata density is clearly heritable, the genetic variants controlling  
443 these traits are not causing strong association signals in GWAS. Theoretically, the presence of  
444 a large effect QTL impacting local adaptation can be masked by correction for population  
445 structure. However, not correcting for population structure is known to lead to a high number  
446 of false-positives and is thus not a reliable alternative (Vilhjálmsón & Nordborg, 2012).  
447 Nevertheless, we can conclude that variation in stomata patterning is controlled by a  
448 combination of i) alleles of moderate effect size segregating at frequencies too low to be  
449 detected by GWAS, and/or ii) alleles segregating at high frequency but with effect size too  
450 small to be detected and/or iii) rare alleles of small effect. In addition, it is possible that the

451 effect of associated loci is weakened by epistatic interactions among loci. In *A. thaliana*, the  
452 genetic architecture of natural variation in stomata traits is therefore not caused by a handful  
453 of large effect variants but complex and polygenic.

454

455 Using MTMM analysis (Korte et al., 2012), we further investigated the impact of genetic  
456 variation on the negative co-variation between stomata size and density. This analysis  
457 revealed that genetic similarity does not influence the pattern of covariation. It implies that  
458 either multiple alleles act epistatically on the covariation, or that physical or environmental  
459 factors explain the correlation.

460

461

462 **Natural variation in stomata patterning can contribute to optimize physiological**  
463 **performance**

464 Both stomata development and reactions to drought stress are being intensively investigated  
465 in *A. thaliana* (Bergmann & Sack, 2007; Krasensky & Jonak, 2012; Pillitteri & Torii, 2012;  
466 Verslues, Govinal Badiger, Ravi, & M. Nagaraj, 2013). Mutants in stomata density or size  
467 have recently been shown to have a clear impact carbon physiology (Franks et al., 2015;  
468 Hepworth, Doheny-Adams, Hunt, Cameron, & Gray, 2015; Hughes et al., 2017; S. S.  
469 Lawson, Pijut, & Michler, 2014; Masle, Gilmore, & Farquhar, 2005; Yoo et al., 2010; Yu et  
470 al., 2008). Yet, the relevance of natural variation in stomatal patterning for facing local  
471 limitations in water availability, had not been documented in this species so far. We provide  
472 here concomitant measures of morphological and physiological variation to examine the  
473 impact of variation in stomatal patterning on natural variation in WUE. By including genome-  
474 wide patterns of nucleotide diversity, our analysis presents two major findings: i) the decrease

475 in stomata size associates with an increase in WUE in *A. thaliana* and ii) this pattern of co-  
476 variation has a genetic basis. This shows that, in *A. thaliana*, variation in stomata size has the  
477 potential to be involved in the optimization of physiological processes controlling the trade-  
478 off between growth and water loss. Interestingly, in the close relative *A. lyrata ssp. lyrata*,  
479 stomata were observed to grow smaller in experimental drought compared to well-watered  
480 conditions, which coincided with increased WUE (Paccard, Fruleux, & Willi, 2014). This  
481 suggest that the consequences of decreased stomata size are conserved in the genus.

482

483 While variation for stomata size and density is likely shaped by a complex genetic  
484 architecture that hindered QTL detection, we detected two regions in the genome that  
485 associated significantly with carbon isotope discrimination. Three previous QTL mapping  
486 analyses, including one between locally adapted lines from Sweden and Italy, identified 16  
487 distinct QTLs controlling  $\delta^{13}\text{C}$  (Juenger et al., 2005; McKay et al., 2008; Mojica et al., 2016).  
488 One of these is caused by a rare allele in the root-expressed gene *MITOGEN ACTIVATED*  
489 *PROTEIN KINASE 12 (MPK-12)*, (Campitelli, Des Marais, & Juenger, 2016; Juenger et al.,  
490 2005). While QTL-mapping approaches can only reveal the variance shown by the parental  
491 lines, GWAS approaches fail to detect rare alleles unless they have a very strong impact. It is  
492 therefore not surprising that the loci that stand out in GWAS do not overlap with the QTL  
493 previously mapped. In fact, one of the mapping populations used the parental genotype Cvi-0,  
494 a genotypic and phenotypic outlier.

495 The two QTL we report here on chromosomes 2 and 4 add two novel loci, raising the number  
496 of genomic regions known to impact  $\delta^{13}\text{C}$  in *A. thaliana* to 18. The novel loci we report are  
497 locally frequent. Individuals carrying the minor alleles of both loci are almost exclusively  
498 from Southern Sweden and display significantly higher  $\delta^{13}\text{C}$  than other Southern Swedish

499 accessions. However, we did not find any climatic factor significantly correlated with the  
500 allelic states of our QTLs. This suggests that other factors, like soil composition, play a role in  
501 drought adaptation. Alternatively, locally adapted alleles may not yet be fixed within the  
502 region.

503

504 Interestingly, the accessions with the minor allele associating with high  $\delta^{13}\text{C}$  in both QTL did  
505 not show decreased stomata size compared to other accessions. Multi-trait GWAS confirmed  
506 that these QTL are associated with  $\delta^{13}\text{C}$  variants that are independent of genetic variation for  
507 stomata patterning. We therefore can conclude that, stomata patterning is only one of the traits  
508 contributing to the optimization of WUE. A large array of molecular and physiological  
509 reactions is indeed known to contribute to tolerance to drought stress (Krasensky & Jonak,  
510 2012; Verslues et al., 2013). The close vicinity of the chromosome 2 QTL to a non-  
511 synonymous mutation in a gene encoding an LEA protein, known to act as a chaperone when  
512 cells dehydrate, suggests one possible mechanism by which WUE might be optimized  
513 independently of stomata size and density (Candat et al., 2014; Eriksson, Kutzer, Procek,  
514 Gröbner, & Harryson, 2011; Reyes et al., 2005). Variation in rates of proline accumulation in  
515 the presence of drought stress or in nutrient acquisition in the root are also among the  
516 physiological mechanism that appear to have contributed to improve drought stress tolerance  
517 in this species (Campitelli et al., 2016; Kesari et al., 2012).

518

519

520 Adaptive evolution of stomata patterning is suggested by the geographic distribution  
521 of genetic variation

522 Phenotypic variation for stomata patterning and carbon uptake is not uniformly distributed  
523 throughout the species range. All three phenotypes we report in this study were significantly  
524 differentiated between the five broad regions defined in our sample of 330 genotypes. We  
525 performed a comparison of phenotypic and nucleotide levels of divergence to evaluate the  
526 putative role of past selective events in shaping the distribution of diversity we report  
527 (Leinonen et al., 2013; Whitlock & Guillaume, 2009). Because these regions are not equally  
528 distant,  $F_{ST}/Q_{ST}$  comparisons averaged over all populations may mask local patterns of  
529 adaptation (Leinonen et al., 2013). We therefore measured  $Q_{ST}$  between pairs of regions and  
530 compared them to the distribution of pairwise  $F_{ST}$ , using permutations to establish the  
531 significance of outlier  $Q_{ST}$ . This analysis showed that, for all three traits, differentiation  
532 between some regions was stronger than expected from genome-wide patterns of diversity,  
533 suggesting local adaptation. This is further supported by our finding that stomata density and  
534 stomata size correlated with climatic PCs, which are most strongly driven by temperature,  
535 humidity, solar radiation, and historic drought regimen.

536  
537 The strongest  $Q_{ST}-F_{ST}$  differences are found across regional pairs including Central Europe.  
538 Particularly, WUE is significantly differentiated between Central Europe and Spain as well as  
539 both Swedish regions, due to low WUE in Central Europe. It is tempting to speculate that the  
540 significantly lower WUE observed in Central Europe results from selection for life cycling at  
541 latitudes where two life cycles can be completed each year, as high WUE is usually associated  
542 with a reduction in photosynthetic rate (Blum, 2009; Field et al., 1983; Kimball et al., 2014).  
543 Interestingly, Central Europe and Southern Sweden are significantly differentiated for all



544 three traits and Southern Sweden and Spain are significantly differentiated for both stomata  
545 traits. Combined with the fact that Swedish genotypes show the highest values for WUE, this  
546 suggests that stomata size is involved in drought adaptation of Swedish accessions. This result  
547 is somewhat counterintuitive because Sweden is not known to be a region experiencing  
548 intense drought. However, our result is supported by an independent study showing that  
549 Northern and Southern Swedish genotypes maintain photosynthetic activity under terminal  
550 drought stress longer than other, especially Central and Western European, accessions  
551 (Exposito-Alonso et al., 2017). Additionally, locally adapted genotypes from Northern  
552 Sweden (which showed high WUE in our study, as well) have been shown to display higher  
553 WUE than Italian genotypes (Mojica et al., 2016).

554 This regional difference in *A. thaliana* further coincides with the satellite measurements of  
555 historic drought regimen, which show that Sweden is a region where drought frequency is  
556 changing throughout the season: it is relatively more frequent in the early growing season  
557 (spring) than in the late growing season (summer). Drought episodes occurring earlier in the  
558 growth season may favor the evolution of drought avoidance traits (e.g. morphological or  
559 physiological stress adaptations) over that of escape strategies mediated by e.g. seed  
560 dormancy (Kooyers, 2015; Passioura, 1996). Indeed, in Northern Europe, increased negative  
561 co-variation between flowering time and seed dormancy suggested that the narrow growth  
562 season imposes a strong selection on life-history traits (Debieu et al., 2013). In Southern  
563 European regions, *A. thaliana* appeared to rely on escape strategies provided by increased  
564 seed dormancy (Kronholm et al., 2012). Taken together, this suggests that decreased stomata  
565 size and, consequently, increased  $\delta^{13}\text{C}$  have contributed to adaptation to water limitations in  
566 spring in a region where the narrow growth season leaves no room for escape strategies.

567 Indeed, both stomata size and  $\delta^{13}\text{C}$  associate with historic drought regimen. For  $\delta^{13}\text{C}$ ,

568 however, this association disappears when genetic population structure is included as a  
569 covariate. This indicates that local adaptation for WUE might have contributed to shape  
570 current population structure.

571

572 Finally, the coarse regional contrasts used in the present study cannot resolve patterns of local  
573 adaptation occurring at a fine-grained scale within regions (as e.g. local adaptation to specific  
574 soil patches). In fact, we observe most variation for all three phenotypes within regions. It is  
575 therefore possible that we underestimate the magnitude of adaptive differentiation across the  
576 species' European range, which could further explain why  $Q_{ST} / F_{ST}$  differences did not co-  
577 vary with environmental divergence in our dataset.

578

579

## 580 Conclusion

581 This work provides a comprehensive description of the variation in stomata size and density  
582 that segregates throughout the European range of *A. thaliana*. It shows that stomata size  
583 covaries with water-use efficiency and may contribute to local adaptation. Several reports  
584 indicate that plants can also change stomatal development in water-limiting conditions  
585 (Fraser, Greenall, Carlyle, Turkington, & Friedman, 2009; Paccard et al., 2014; Xu & Zhou,  
586 2008). Future work will have to investigate whether this variation in stomata size and number  
587 also contributes to adaptive plasticity to drought stress.

588

## 589 Acknowledgements

590 We thank Swantje Prah and Hildegard Schwitte for technical support in microscopy, Maria  
591 Graf for technical assistance in  $\delta^{13}C$  analysis, Anja Linstädter for advice in statistical analysis  
592 and Angela Hancock for critical comments on the manuscript. This research was supported by

593 the Deutsche Forschungsgemeinschaft (DFG) through grant INST211/575-1 for the OPERA  
594 microscope, and grant ME2742/6-1 in the realm of SPP1529 “Adaptomics”, as well as by the  
595 European Research Council with Grant 648617 “AdaptoSCOPE”.

596

## 597 References

- 598 Alonso-Blanco, C., Andrade, J., Becker, C., Bemm, F., Bergelson, J., Borgwardt, K. M., ...  
599 Zhou, X. (2016). 1,135 Genomes Reveal the Global Pattern of Polymorphism in  
600 *Arabidopsis thaliana*. *Cell*, *166*(2), 481–491.  
601 <https://doi.org/10.1016/j.cell.2016.05.063>
- 602 Anderson, V. J., & Briske, D. D. (1990). Stomatal Distribution, Density and Conductance of  
603 Three Perennial Grasses Native to the Southern True Prairie of Texas. *The*  
604 *American Midland Naturalist*, *123*(1), 152–159.  
605 <https://doi.org/10.2307/2425768>
- 606 Arnold, J. B., Daroczi, G., Werth, B., Weitzner, B., Kunst, J., Auguie, B., ... London, J. (2017).  
607 ggthemes: Extra Themes, Scales and Geoms for “ggplot2” (Version 3.4.0).  
608 Retrieved from <https://cran.r-project.org/web/packages/ggthemes/index.html>
- 609 Atwell, S., Huang, Y. S., Vilhjálmsson, B. J., Willems, G., Horton, M., Li, Y., ... Nordborg, M.  
610 (2010). Genome-wide association study of 107 phenotypes in *Arabidopsis*  
611 *thaliana* inbred lines. *Nature*, *465*(7298), 627–631.  
612 <https://doi.org/10.1038/nature08800>
- 613 Bakker, J. C. (1991). Effects of humidity on stomatal density and its relation to leaf  
614 conductance. *Scientia Horticulturae*, *48*(3), 205–212.  
615 [https://doi.org/10.1016/0304-4238\(91\)90128-L](https://doi.org/10.1016/0304-4238(91)90128-L)
- 616 Bergmann, D. C., & Sack, F. D. (2007). Stomatal Development. *Annual Review of Plant*  
617 *Biology*, *58*(1), 163–181.  
618 <https://doi.org/10.1146/annurev.arplant.58.032806.104023>
- 619 Blum, A. (2009). Effective use of water (EUW) and not water-use efficiency (WUE) is the  
620 target of crop yield improvement under drought stress. *Field Crops Research*,  
621 *112*(2), 119–123. <https://doi.org/10.1016/j.fcr.2009.03.009>
- 622 Browning, B. L., & Browning, S. R. (2009). A Unified Approach to Genotype Imputation  
623 and Haplotype-Phase Inference for Large Data Sets of Trios and Unrelated  
624 Individuals. *The American Journal of Human Genetics*, *84*(2), 210–223.  
625 <https://doi.org/10.1016/j.ajhg.2009.01.005>
- 626 Burghardt, L. T., Metcalf, C. J. E., Wilczek, A. M., Schmitt, J., & Donohue, K. (2015).  
627 Modeling the Influence of Genetic and Environmental Variation on the Expression  
628 of Plant Life Cycles across Landscapes. *The American Naturalist*, *185*(2), 212–227.  
629 <https://doi.org/10.1086/679439>
- 630 Campitelli, B. E., Des Marais, D. L., & Juenger, T. E. (2016). Ecological interactions and the  
631 fitness effect of water-use efficiency: Competition and drought alter the impact of  
632 natural MPK12 alleles in *Arabidopsis*. *Ecology Letters*, *19*(4), 424–434.  
633 <https://doi.org/10.1111/ele.12575>
- 634 Candat, A., Paszkiewicz, G., Neveu, M., Gautier, R., Logan, D. C., Avelange-Macherel, M.-H.,  
635 & Macherel, D. (2014). The Ubiquitous Distribution of Late Embryogenesis

- 636 Abundant Proteins across Cell Compartments in Arabidopsis Offers Tailored  
637 Protection against Abiotic Stress. *The Plant Cell*, 26(7), 3148–3166.  
638 <https://doi.org/10.1105/tpc.114.127316>
- 639 Carlson, J. E., Adams, C. A., & Holsinger, K. E. (2016). Intraspecific variation in stomatal  
640 traits, leaf traits and physiology reflects adaptation along aridity gradients in a  
641 South African shrub. *Annals of Botany*, 117(1), 195–207.  
642 <https://doi.org/10.1093/aob/mcv146>
- 643 Carroll, S. P., Hendry, A. P., Reznick, D. N., & Fox, C. W. (2007). Evolution on ecological  
644 time-scales. *Functional Ecology*, 21(3), 387–393. <https://doi.org/10.1111/j.1365-2435.2007.01289.x>
- 646 Chater, C., Kamisugi, Y., Movahedi, M., Fleming, A., Cuming, A. C., Gray, J. E., & Beerling, D.  
647 J. (2011). Regulatory mechanism controlling stomatal behavior conserved across  
648 400 million years of land plant evolution. *Current Biology: CB*, 21(12), 1025–  
649 1029. <https://doi.org/10.1016/j.cub.2011.04.032>
- 650 Cowan, I. R. (1986). Economics of carbon fixation in higher plants. *On the Economy of*  
651 *Plant Form and Function : Proceedings of the Sixth Maria Moors Cabot Symposium,*  
652 *Evolutionary Constraints on Primary Productivity, Adaptive Patterns of Energy*  
653 *Capture in Plants, Harvard Forest, August 1983.* Retrieved from  
654 <http://agris.fao.org/agris-search/search.do?recordID=US201301399273>
- 655 Cowan, I. R., & Farquhar, G. D. (1977). Stomatal function in relation to leaf metabolism  
656 and environment. *Symposia of the Society for Experimental Biology*, 31, 471–505.
- 657 Danecek, P., Auton, A., Abecasis, G., Albers, C. A., Banks, E., DePristo, M. A., ... Durbin, R.  
658 (2011). The variant call format and VCFtools. *Bioinformatics*, 27(15), 2156–2158.  
659 <https://doi.org/10.1093/bioinformatics/btr330>
- 660 Daszkowska-Golec, A., & Szarejko, I. (2013). Open or Close the Gate – Stomata Action  
661 Under the Control of Phytohormones in Drought Stress Conditions. *Frontiers in*  
662 *Plant Science*, 4. <https://doi.org/10.3389/fpls.2013.00138>
- 663 Debieu, M., Tang, C., Stich, B., Sikosek, T., Effgen, S., Josephs, E., ... Meaux, J. de. (2013). Co-  
664 Variation between Seed Dormancy, Growth Rate and Flowering Time Changes  
665 with Latitude in Arabidopsis thaliana. *PLOS ONE*, 8(5), e61075.  
666 <https://doi.org/10.1371/journal.pone.0061075>
- 667 Delgado, D., Alonso-Blanco, C., Fenoll, C., & Mena, M. (2011). Natural variation in  
668 stomatal abundance of Arabidopsis thaliana includes cryptic diversity for  
669 different developmental processes. *Annals of Botany*, 107(8), 1247–1258.  
670 <https://doi.org/10.1093/aob/mcr060>
- 671 Doheny-Adams, T., Hunt, L., Franks, P. J., Beerling, D. J., & Gray, J. E. (2012). Genetic  
672 manipulation of stomatal density influences stomatal size, plant growth and  
673 tolerance to restricted water supply across a growth carbon dioxide gradient.  
674 *Philosophical Transactions of the Royal Society B: Biological Sciences*, 367(1588),  
675 547–555. <https://doi.org/10.1098/rstb.2011.0272>
- 676 Drake, P. L., Froend, R. H., & Franks, P. J. (2013). Smaller, faster stomata: scaling of  
677 stomatal size, rate of response, and stomatal conductance. *Journal of*  
678 *Experimental Botany*, 64(2), 495–505. <https://doi.org/10.1093/jxb/ers347>
- 679 Eriksson, S. K., Kutzer, M., Procek, J., Gröbner, G., & Harryson, P. (2011). Tunable  
680 membrane binding of the intrinsically disordered dehydrin Lti30, a cold-induced  
681 plant stress protein. *The Plant Cell*, 23(6), 2391–2404.  
682 <https://doi.org/10.1105/tpc.111.085183>

- 683 Exposito-Alonso, M., Vasseur, F., Ding, W., Wang, G., Burbano, H. A. A., & Weigel, D.  
684 (2017). Genomic basis and evolutionary potential for extreme drought  
685 adaptation in *Arabidopsis thaliana*. *BioRxiv*, 118067.  
686 <https://doi.org/10.1101/118067>
- 687 Farquhar, G. D., Hubick, K. T., Condon, A. G., & Richards, R. A. (1989). Carbon Isotope  
688 Fractionation and Plant Water-Use Efficiency. In P. W. Rundel, J. R. Ehleringer, &  
689 K. A. Nagy (Eds.), *Stable Isotopes in Ecological Research* (pp. 21–40). New York,  
690 NY: Springer New York. [https://doi.org/10.1007/978-1-4612-3498-2\\_2](https://doi.org/10.1007/978-1-4612-3498-2_2)
- 691 Fick, S. E., & Hijmans, R. J. (2017). WorldClim 2: new 1-km spatial resolution climate  
692 surfaces for global land areas. *International Journal of Climatology*.
- 693 Field, C., Merino, J., & Mooney, H. A. (1983). Compromises between Water-Use Efficiency  
694 and Nitrogen-Use Efficiency in Five Species of California Evergreens. *Oecologia*,  
695 *60*(3), 384–389.
- 696 Fournier-Level, A., Korte, A., Cooper, M. D., Nordborg, M., Schmitt, J., & Wilczek, A. M.  
697 (2011). A Map of Local Adaptation in *Arabidopsis thaliana*. *Science*, *334*(6052),  
698 86–89. <https://doi.org/10.1126/science.1209271>
- 699 Fox, J., Weisberg, S., Friendly, M., Hong, J., Andersen, R., Firth, D., & Taylor, S. (2016).  
700 effects: Effect Displays for Linear, Generalized Linear, and Other Models (Version  
701 3.1-2). Retrieved from [https://cran.r-](https://cran.r-project.org/web/packages/effects/index.html)  
702 [project.org/web/packages/effects/index.html](https://cran.r-project.org/web/packages/effects/index.html)
- 703 Franks, P. J., & Beerling, D. J. (2009). Maximum leaf conductance driven by CO<sub>2</sub> effects on  
704 stomatal size and density over geologic time. *Proceedings of the National Academy*  
705 *of Sciences*, *106*(25), 10343–10347. <https://doi.org/10.1073/pnas.0904209106>
- 706 Franks, P. J., Drake, P. L., & Beerling, D. J. (2009). Plasticity in maximum stomatal  
707 conductance constrained by negative correlation between stomatal size and  
708 density: an analysis using *Eucalyptus globulus*. *Plant, Cell & Environment*, *32*(12),  
709 1737–1748. <https://doi.org/10.1111/j.1365-3040.2009.002031.x>
- 710 Franks, P. J., W. Doheny-Adams, T., Britton-Harper, Z. J., & Gray, J. E. (2015). Increasing  
711 water-use efficiency directly through genetic manipulation of stomatal density.  
712 *New Phytologist*, *207*(1), 188–195. <https://doi.org/10.1111/nph.13347>
- 713 Fraser, L. H., Greenall, A., Carlyle, C., Turkington, R., & Friedman, C. R. (2009). Adaptive  
714 phenotypic plasticity of *Pseudoroegneria spicata*: response of stomatal density,  
715 leaf area and biomass to changes in water supply and increased temperature.  
716 *Annals of Botany*, *103*(5), 769–775. <https://doi.org/10.1093/aob/mcn252>
- 717 Gaut, B. (2012). *Arabidopsis thaliana* as a model for the genetics of local adaptation.  
718 *Nature Genetics*, *44*(2), 115–116. <https://doi.org/10.1038/ng.1079>
- 719 Goudet, J. (2005). hierfstat, a package for r to compute and test hierarchical F-statistics.  
720 *Molecular Ecology Notes*, *5*(1), 184–186. [https://doi.org/10.1111/j.1471-](https://doi.org/10.1111/j.1471-8286.2004.00828.x)  
721 [8286.2004.00828.x](https://doi.org/10.1111/j.1471-8286.2004.00828.x)
- 722 Hamilton, J. A., Okada, M., Korves, T., & Schmitt, J. (2015). The role of climate adaptation  
723 in colonization success in *Arabidopsis thaliana*. *Molecular Ecology*, *24*(9), 2253–  
724 2263. <https://doi.org/10.1111/mec.13099>
- 725 Hancock, A. M., Brachi, B., Faure, N., Horton, M. W., Jarymowycz, L. B., Sperone, F. G., ...  
726 Bergelson, J. (2011). Adaptation to Climate Across the *Arabidopsis thaliana*  
727 Genome. *Science*, *334*(6052), 83–86. <https://doi.org/10.1126/science.1209244>
- 728 Hendry, A. P. (2016). *Eco-evolutionary Dynamics*. Princeton University Press.

- 729 Hepworth, C., Doheny-Adams, T., Hunt, L., Cameron, D. D., & Gray, J. E. (2015).  
730 Manipulating stomatal density enhances drought tolerance without deleterious  
731 effect on nutrient uptake. *The New Phytologist*, 208(2), 336–341.  
732 <https://doi.org/10.1111/nph.13598>
- 733 Hetherington, A. M., & Woodward, F. I. (2003). The role of stomata in sensing and driving  
734 environmental change. *Nature*, 424(6951), 901–908.  
735 <https://doi.org/10.1038/nature01843>
- 736 Hothorn, T., Bretz, F., Westfall, P., Heiberger, R. M., Schuetzenmeister, A., & Scheibe, S.  
737 (2017). multcomp: Simultaneous Inference in General Parametric Models  
738 (Version 1.4-7). Retrieved from [https://cran.r-](https://cran.r-project.org/web/packages/multcomp/index.html)  
739 [project.org/web/packages/multcomp/index.html](https://cran.r-project.org/web/packages/multcomp/index.html)
- 740 Hughes, J., Hepworth, C., Dutton, C., Dunn, J. A., Hunt, L., Stephens, J., ... Gray, J. E. (2017).  
741 Reducing Stomatal Density in Barley Improves Drought Tolerance without  
742 Impacting on Yield. *Plant Physiology*, 174(2), 776–787.  
743 <https://doi.org/10.1104/pp.16.01844>
- 744 Jombart, T., Kamvar, Z. N., Lustrik, R., Collins, C., Beugin, M.-P., Knaus, B., ... Calboli, F.  
745 (2016). adegenet: Exploratory Analysis of Genetic and Genomic Data (Version  
746 2.0.1). Retrieved from [https://cran.r-](https://cran.r-project.org/web/packages/adegenet/index.html)  
747 [project.org/web/packages/adegenet/index.html](https://cran.r-project.org/web/packages/adegenet/index.html)
- 748 Juenger, T. E., McKay, J. K., Hausmann, N., Keurentjes, J. J. B., Sen, S., Stowe, K. A., ...  
749 Richards, J. H. (2005). Identification and characterization of QTL underlying  
750 whole-plant physiology in Arabidopsis thaliana:  $\delta^{13}C$ , stomatal conductance and  
751 transpiration efficiency. *Plant, Cell & Environment*, 28(6), 697–708.  
752 <https://doi.org/10.1111/j.1365-3040.2004.01313.x>
- 753 Kahle, D., & Wickham, H. (2013). ggmap: Spatial Visualization with ggplot2. *The R*  
754 *Journal*, 5(1), 144–161.
- 755 Kang, H. M., Sul, J. H., Service, S. K., Zaitlen, N. A., Kong, S., Freimer, N. B., ... Eskin, E.  
756 (2010). Variance component model to account for sample structure in genome-  
757 wide association studies. *Nature Genetics*, 42(4), 348–354.  
758 <https://doi.org/10.1038/ng.548>
- 759 Kang, H. M., Zaitlen, N. A., Wade, C. M., Kirby, A., Heckerman, D., Daly, M. J., & Eskin, E.  
760 (2008). Efficient control of population structure in model organism association  
761 mapping. *Genetics*, 178(3), 1709–1723.  
762 <https://doi.org/10.1534/genetics.107.080101>
- 763 Kesari, R., Lasky, J. R., Villamor, J. G., Marais, D. L. D., Chen, Y.-J. C., Liu, T.-W., ... Verslues,  
764 P. E. (2012). Intron-mediated alternative splicing of Arabidopsis P5CS1 and its  
765 association with natural variation in proline and climate adaptation. *Proceedings*  
766 *of the National Academy of Sciences*, 109(23), 9197–9202.  
767 <https://doi.org/10.1073/pnas.1203433109>
- 768 Kimball, S., Gremer, J. R., Barron-Gafford, G. A., Angert, A. L., Huxman, T. E., & Venable, D.  
769 L. (2014). High water-use efficiency and growth contribute to success of non-  
770 native *Erodium cicutarium* in a Sonoran Desert winter annual community.  
771 *Conservation Physiology*, 2(1). <https://doi.org/10.1093/conphys/cou006>
- 772 Kinoshita, T., Ono, N., Hayashi, Y., Morimoto, S., Nakamura, S., Soda, M., ... Shimazaki, K.  
773 (2011). FLOWERING LOCUS T Regulates Stomatal Opening. *Current Biology*,  
774 21(14), 1232–1238. <https://doi.org/10.1016/j.cub.2011.06.025>

- 775 Knaus, B. J., Grunwald, N. J., Anderson, E. C., Winter, D. J., & Kamvar, Z. N. (2017). vcfR:  
776 Manipulate and Visualize VCF Data (Version 1.4.0). Retrieved from  
777 <https://cran.r-project.org/web/packages/vcfR/index.html>
- 778 Kogan, F. N. (1995). Application of vegetation index and brightness temperature for  
779 drought detection. *Advances in Space Research*, 15(11), 91–100.  
780 [https://doi.org/10.1016/0273-1177\(95\)00079-T](https://doi.org/10.1016/0273-1177(95)00079-T)
- 781 Kooyers, N. J. (2015). The evolution of drought escape and avoidance in natural  
782 herbaceous populations. *Plant Science*, 234, 155–162.  
783 <https://doi.org/10.1016/j.plantsci.2015.02.012>
- 784 Korte, A., & Farlow, A. (2013). The advantages and limitations of trait analysis with  
785 GWAS: a review. *Plant Methods*, 9, 29. <https://doi.org/10.1186/1746-4811-9-29>
- 786 Korte, A., Vilhjálmsson, B. J., Segura, V., Platt, A., Long, Q., & Nordborg, M. (2012). A  
787 mixed-model approach for genome-wide association studies of correlated traits  
788 in structured populations. *Nature Genetics*, 44(9), 1066–1071.  
789 <https://doi.org/10.1038/ng.2376>
- 790 Krasensky, J., & Jonak, C. (2012). Drought, salt, and temperature stress-induced  
791 metabolic rearrangements and regulatory networks. *Journal of Experimental*  
792 *Botany*, 63(4), 1593–1608. <https://doi.org/10.1093/jxb/err460>
- 793 Kronholm, I., Picó, F. X., Alonso-Blanco, C., Goudet, J., & Meaux, J. de. (2012). Genetic Basis  
794 of Adaptation in Arabidopsis Thaliana: Local Adaptation at the Seed Dormancy  
795 Qtl Dog1. *Evolution*, 66(7), 2287–2302. <https://doi.org/10.1111/j.1558-5646.2012.01590.x>
- 796
- 797 Lambers, H., Chapin, F. S., & Pons, T. L. (1998). Photosynthesis, Respiration, and Long-  
798 Distance Transport. In *Plant Physiological Ecology* (pp. 10–153). Springer, New  
799 York, NY. [https://doi.org/10.1007/978-1-4757-2855-2\\_2](https://doi.org/10.1007/978-1-4757-2855-2_2)
- 800 Lasky, J. R., Marais, D., L, D., Lowry, D. B., Povolotskaya, I., McKay, J. K., ... Juenger, T. E.  
801 (2014). Natural Variation in Abiotic Stress Responsive Gene Expression and Local  
802 Adaptation to Climate in Arabidopsis thaliana. *Molecular Biology and Evolution*,  
803 31(9), 2283–2296. <https://doi.org/10.1093/molbev/msu170>
- 804 Lawson, S. S., Pijut, P. M., & Michler, C. H. (2014). The cloning and characterization of a  
805 poplar stomatal density gene. *Genes & Genomics*. 36(4): 427-441., 36(4), 427–441.  
806 <https://doi.org/10.1007/s13258-014-0177-x>
- 807 Lawson, T., Kramer, D. M., & Raines, C. A. (2012). Improving yield by exploiting  
808 mechanisms underlying natural variation of photosynthesis. *Current Opinion in*  
809 *Biotechnology*, 23(2), 215–220. <https://doi.org/10.1016/j.copbio.2011.12.012>
- 810 Leinonen, T., McCairns, R. S., O'hara, R. B., & Merilä, J. (2013). QST–FST comparisons:  
811 evolutionary and ecological insights from genomic heterogeneity. *Nature Reviews*  
812 *Genetics*, 14(3), 179–190.
- 813 Martin, B., & Thorstenson, Y. R. (1988). Stable Carbon Isotope Composition ( $\delta^{13}C$ ),  
814 Water Use Efficiency, and Biomass Productivity of *Lycopersicon esculentum*,  
815 *Lycopersicon pennellii*, and the F1 Hybrid. *Plant Physiology*, 88(1), 213–217.  
816 <https://doi.org/10.1104/pp.88.1.213>
- 817 Masle, J., Gilmore, S. R., & Farquhar, G. D. (2005). The ERECTA gene regulates plant  
818 transpiration efficiency in Arabidopsis. *Nature*, 436(7052), 866.  
819 <https://doi.org/10.1038/nature03835>
- 820 McDowell, N., Pockman, W. T., Allen, C. D., Breshears, D. D., Cobb, N., Kolb, T., ... Yepez, E.  
821 A. (2008). Mechanisms of plant survival and mortality during drought: why do

- 822 some plants survive while others succumb to drought? *New Phytologist*, 178(4),  
823 719–739. <https://doi.org/10.1111/j.1469-8137.2008.02436.x>
- 824 McKay, J. K., Richards, J. H., Nemali, K. S., Sen, S., Mitchell-Olds, T., Boles, S., ... Juenger, T.  
825 E. (2008). Genetics of Drought Adaptation in *Arabidopsis thaliana* li. Qtl Analysis  
826 of a New Mapping Population, Kas-1 × Tsu-1. *Evolution*, 62(12), 3014–3026.  
827 <https://doi.org/10.1111/j.1558-5646.2008.00474.x>
- 828 Mojica, J. P., Mullen, J., Lovell, J. T., Monroe, J. G., Paul, J. R., Oakley, C. G., & McKay, J. K.  
829 (2016). Genetics of water use physiology in locally adapted *Arabidopsis thaliana*.  
830 *Plant Science*, 251(Supplement C), 12–22.  
831 <https://doi.org/10.1016/j.plantsci.2016.03.015>
- 832 Muchow, R. C., & Sinclair, T. R. (1989). Epidermal conductance, stomatal density and  
833 stomatal size among genotypes of *Sorghum bicolor* (L.) Moench. *Plant, Cell &*  
834 *Environment*, 12(4), 425–431. [https://doi.org/10.1111/j.1365-](https://doi.org/10.1111/j.1365-3040.1989.tb01958.x)  
835 [3040.1989.tb01958.x](https://doi.org/10.1111/j.1365-3040.1989.tb01958.x)
- 836 Nordborg, M., Borevitz, J. O., Bergelson, J., Berry, C. C., Chory, J., Hagenblad, J., ... Weigel,  
837 D. (2002). The extent of linkage disequilibrium in *Arabidopsis thaliana*. *Nature*  
838 *Genetics*, 30(2), 190–193. <https://doi.org/10.1038/ng813>
- 839 Ohsumi, A., Kanemura, T., Homma, K., Horie, T., & Shiraiwa, T. (2007). Genotypic  
840 Variation of Stomatal Conductance in Relation to Stomatal Density and Length in  
841 Rice (*Oryza sativa* L.). *Plant Production Science*, 10(3), 322–328.  
842 <https://doi.org/10.1626/pps.10.322>
- 843 Paccard, A., Fruleux, A., & Willi, Y. (2014). Latitudinal trait variation and responses to  
844 drought in *Arabidopsis lyrata*. *Oecologia*, 175(2), 577–587.  
845 <https://doi.org/10.1007/s00442-014-2932-8>
- 846 Passioura, J. B. (1996). Drought and drought tolerance. In *Drought Tolerance in Higher*  
847 *Plants: Genetical, Physiological and Molecular Biological Analysis* (pp. 1–5).  
848 Springer, Dordrecht. [https://doi.org/10.1007/978-94-017-1299-6\\_1](https://doi.org/10.1007/978-94-017-1299-6_1)
- 849 Pearce, D. W., Millard, S., Bray, D. F., & Rood, S. B. (2006). Stomatal characteristics of  
850 riparian poplar species in a semi-arid environment. *Tree Physiology*, 26(2), 211–  
851 218. <https://doi.org/10.1093/treephys/26.2.211>
- 852 Pillitteri, L. J., & Torii, K. U. (2012). Mechanisms of Stomatal Development. *Annual Review*  
853 *of Plant Biology*, 63(1), 591–614. [https://doi.org/10.1146/annurev-arplant-](https://doi.org/10.1146/annurev-arplant-042811-105451)  
854 [042811-105451](https://doi.org/10.1146/annurev-arplant-042811-105451)
- 855 Pinheiro, J., Bates, D., DebRoy, S., Sarkar, D., & R Core Team. (2015). *nlme: Linear and*  
856 *Nonlinear Mixed Effects Models*. Retrieved from [http://CRAN.R-](http://CRAN.R-project.org/package=nlme)  
857 [project.org/package=nlme](http://CRAN.R-project.org/package=nlme)
- 858 Postma, F. M., & Ågren, J. (2016). Early life stages contribute strongly to local adaptation  
859 in *Arabidopsis thaliana*. *Proceedings of the National Academy of Sciences*, 113(27),  
860 7590–7595. <https://doi.org/10.1073/pnas.1606303113>
- 861 R Development Core Team. (2008). *R: A language and environment for statistical*  
862 *computing*. Retrieved from <http://www.R-project.org>
- 863 Raven, J. A. (2002). Selection pressures on stomatal evolution. *New Phytologist*, 153(3),  
864 371–386. <https://doi.org/10.1046/j.0028-646X.2001.00334.x>
- 865 Raven, J. A. (2014). Speedy small stomata? *Journal of Experimental Botany*, 65(6), 1415–  
866 1424. <https://doi.org/10.1093/jxb/eru032>



- 867 Reich, P. B. (1984). Leaf Stomatal Density and Diffusive Conductance in Three  
868 Amphistomatous Hybrid Poplar Cultivars. *New Phytologist*, 98(2), 231–239.  
869 <https://doi.org/10.1111/j.1469-8137.1984.tb02733.x>
- 870 Reyes, J. L., Rodrigo, M.-J., Colmenero-Flores, J. M., Gil, J.-V., Garay-Arroyo, A., Campos, F.,  
871 ... Covarrubias, A. A. (2005). Hydrophilins from distant organisms can protect  
872 enzymatic activities from water limitation effects in vitro. *Plant, Cell &*  
873 *Environment*, 28(6), 709–718. [https://doi.org/10.1111/j.1365-](https://doi.org/10.1111/j.1365-3040.2005.01317.x)  
874 [3040.2005.01317.x](https://doi.org/10.1111/j.1365-3040.2005.01317.x)
- 875 Seren, Ü., Grimm, D., Fitz, J., Weigel, D., Nordborg, M., Borgwardt, K., & Korte, A. (2017).  
876 AraPheno: a public database for Arabidopsis thaliana phenotypes. *Nucleic Acids*  
877 *Research*, 45(D1), D1054–D1059. <https://doi.org/10.1093/nar/gkw986>
- 878 Trabucco, A., & Zomer, R. (2010). Global soil water balance geospatial database. *CGIAR*  
879 *Consortium for Spatial Information, Published Online, Available from the CGIAR-CSI*  
880 *GeoPortal at: Http://Www.Cgiar-Csi.Org (Last Access: January 2013).*
- 881 Verslues, P. E., Govinal Badiger, B., Ravi, K., & M. Nagaraj, K. (2013). Drought tolerance  
882 mechanisms and their molecular basis. In tthew A. Jenks & P. M. Hasegawa  
883 (Eds.), *Plant Abiotic Stress* (pp. 15–46). John Wiley & Sons, Inc.  
884 <https://doi.org/10.1002/9781118764374.ch2>
- 885 Vilhjálmsson, B. J., & Nordborg, M. (2012, November 20). The nature of confounding in  
886 genome-wide association studies [Comments and Opinion].  
887 <https://doi.org/10.1038/nrg3382>
- 888 Vu, V. Q. (2011). A ggplot2 based biplot (Version 0.55).
- 889 Weinig, C., Ewers, B. E., & Welch, S. M. (2014). Ecological genomics and process modeling  
890 of local adaptation to climate. *Current Opinion in Plant Biology*, 18(Supplement C),  
891 66–72. <https://doi.org/10.1016/j.pbi.2014.02.007>
- 892 Whitlock, M. C., & Guillaume, F. (2009). Testing for Spatially Divergent Selection:  
893 Comparing QST to FST. *Genetics*, 183(3), 1055–1063.  
894 <https://doi.org/10.1534/genetics.108.099812>
- 895 Wickham, H. (2009). *Ggplot2: elegant graphics for data analysis*. New York: Springer.
- 896 Wood, A. R., Esko, T., Yang, J., Vedantam, S., Pers, T. H., Gustafsson, S., ... Frayling, T. M.  
897 (2014). Defining the role of common variation in the genomic and biological  
898 architecture of adult human height. *Nature Genetics*, 46(11), 1173.  
899 <https://doi.org/10.1038/ng.3097>
- 900 Wu, C. A., Lowry, D. B., Nutter, L. I., & Willis, J. H. (2010). Natural variation for drought-  
901 response traits in the Mimulus guttatus species complex. *Oecologia*, 162(1), 23–  
902 33. <https://doi.org/10.1007/s00442-009-1448-0>
- 903 Xu, Z., & Zhou, G. (2008). Responses of leaf stomatal density to water status and its  
904 relationship with photosynthesis in a grass. *Journal of Experimental Botany*,  
905 59(12), 3317–3325. <https://doi.org/10.1093/jxb/ern185>
- 906 Yoo, C. Y., Pence, H. E., Jin, J. B., Miura, K., Gosney, M. J., Hasegawa, P. M., & Mickelbart, M.  
907 V. (2010). The Arabidopsis GTL1 Transcription Factor Regulates Water Use  
908 Efficiency and Drought Tolerance by Modulating Stomatal Density via  
909 Transrepression of SDD1. *The Plant Cell Online*, 22(12), 4128–4141.  
910 <https://doi.org/10.1105/tpc.110.078691>
- 911 Yu, H., Chen, X., Hong, Y.-Y., Wang, Y., Xu, P., Ke, S.-D., ... Xiang, C.-B. (2008). Activated  
912 Expression of an Arabidopsis HD-START Protein Confers Drought Tolerance with

913 Improved Root System and Reduced Stomatal Density. *The Plant Cell*, 20(4),  
914 1134–1151. <https://doi.org/10.1105/tpc.108.058263>  
915  
916

## 917 Data accessibility

918 Raw image data and image analysis scripts are available upon request and will be stored in a  
919 Dryad repository upon acceptance. Phenotypic data is provided in the supplemental material  
920 and will be uploaded to the AraPheno database (<https://arapheno.1001genomes.org>, (Seren et  
921 al., 2017) and stored in a Dryad repository upon acceptance. Additionally, we provide an R  
922 Markdown file, which contains all figures (except GWAS and MTMM) and the  
923 corresponding R code used to create the figures and statistics in the supplemental material.  
924 GWAS scripts are available at <https://github.com/arthurkorte/GWAS>. MTMM scripts are  
925 available at <https://github.com/Gregor-Mendel-Institute/mtmm>.

926 Genomic data used is publicly available in the 1001 genomes database (Alonso-Blanco et al.,  
927 2016)

928

## 929 Author contributions

930 JdM, AK, and HD conceived the study. HD conducted the experiment and produced  
931 phenotypic data for stomata traits. TM and AW were responsible for  $\delta^{13}\text{C}$  measurements. GM  
932 provided data on historic drought regimen. JdM, AK and HD were responsible for the  
933 statistical analyses of the data. JdM and HD wrote the manuscript with significant  
934 contributions from AK, TM, AW and GM.

935

936 **Figures & Tables**

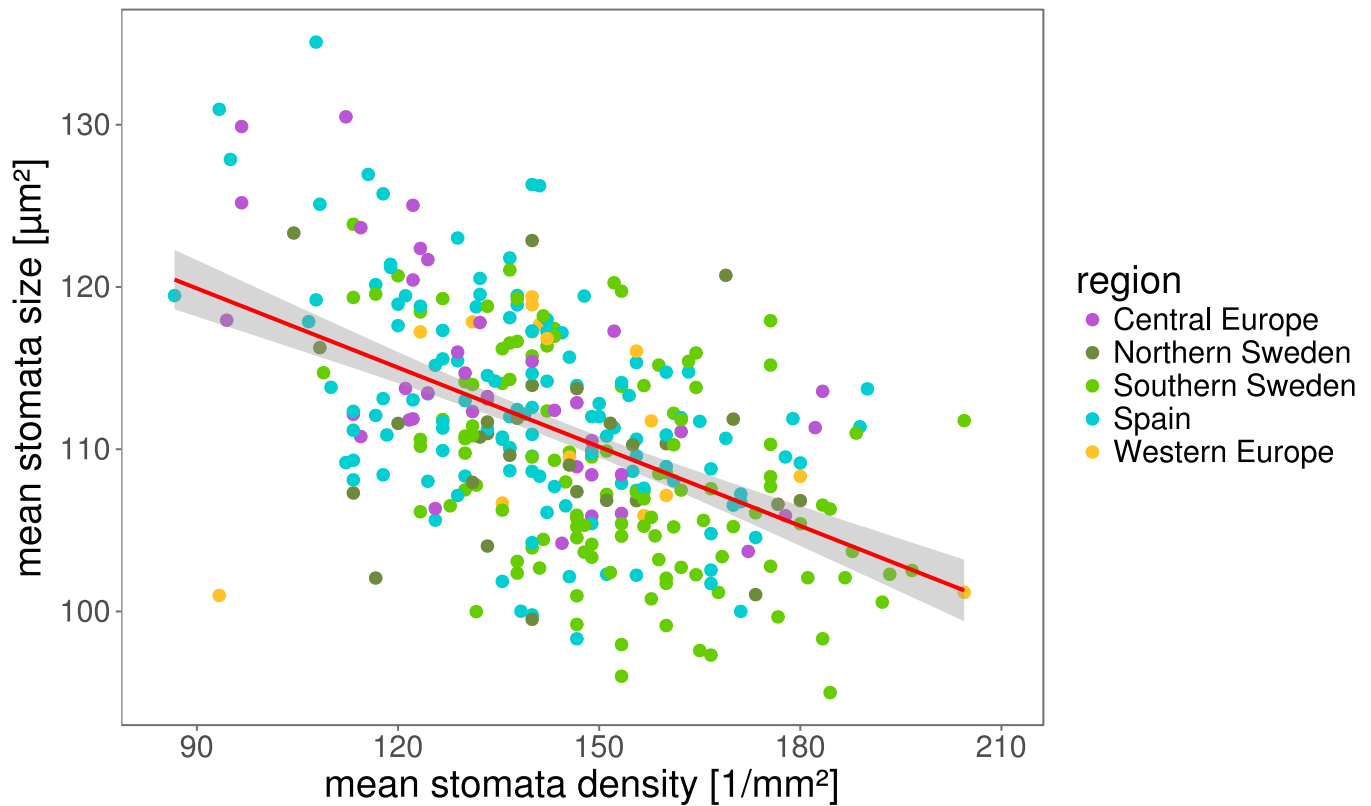

937

938 **Figure 1: Natural variation in stomata patterning**

939 Stomata density and size were measured for 330 natural genotypes of *A. thaliana*. The plot shows  
940 genotypic means of stomata density and stomata size. Dots are colored based on the geographical  
941 origin of each accession. The red line shows a linear fit and gray shadows indicate the error of the fit.  
942 Pearson's product-moment correlation  $r=-0.5$ ,  $p<0.001$ .

943

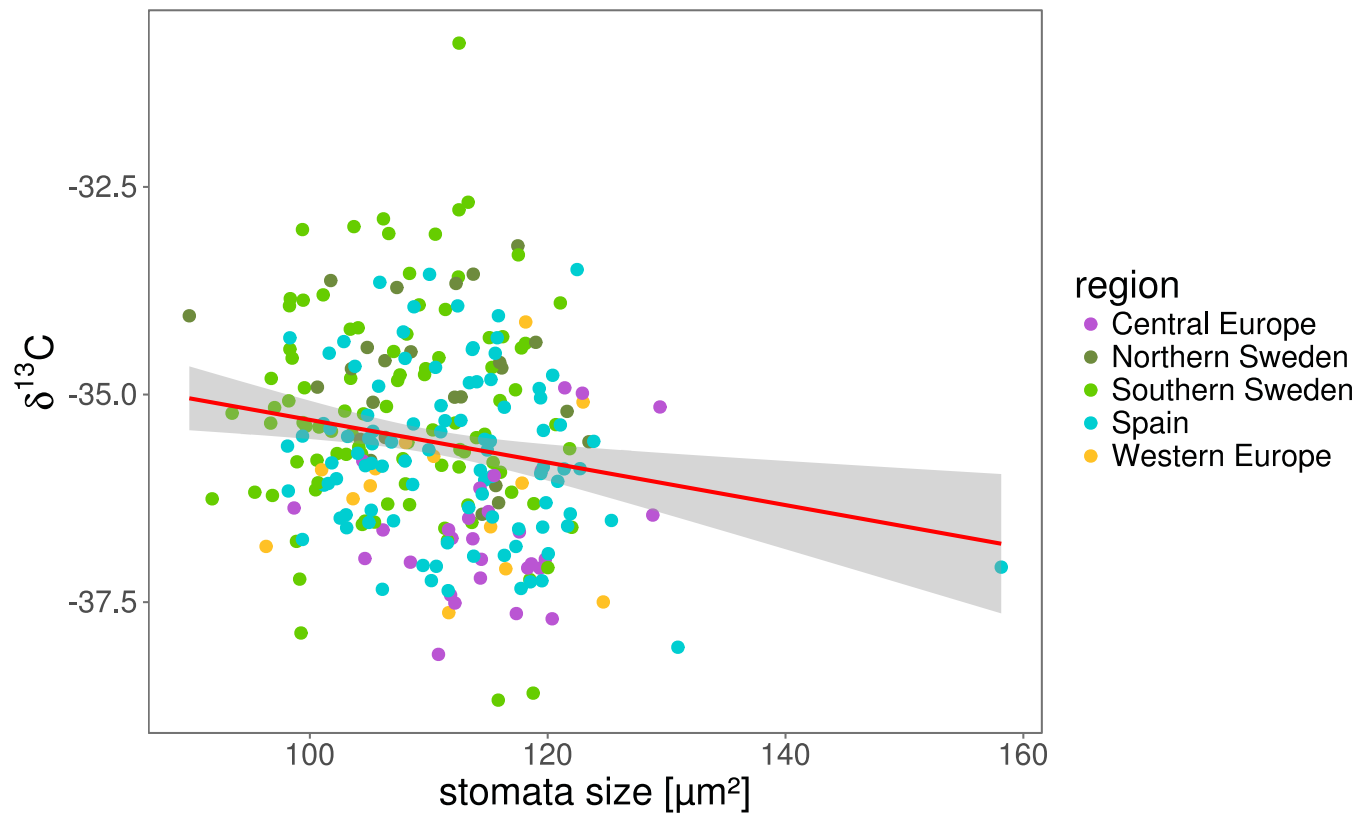

944

945 **Figure 2: Stomata size correlates with water-use efficiency**

946  $\delta^{13}\text{C}$  was measured for all plants in block 1. Plots show correlation of stomata size (block 1 only) with  
947  $\delta^{13}\text{C}$ .  $\delta^{13}\text{C}$  is expressed as ‰ against the Vienna Pee Dee Belemnite (VPDB) standard. The red line  
948 shows a linear fit and gray shadows indicate the error of the fit. Pearson's product-moment correlation:  
949  $r=-0.18$ ,  $p=0.004$ . Correlation of  $\delta^{13}\text{C}$  and stomata size is not only driven by the Spanish outlier  
950 (correlation without outlier:  $r=-0.16$ ,  $p=0.009$ ). Genetic correlation was calculated using the MTMM  
951 approach:  $r=-0.58$ ,  $p<0.05$ .

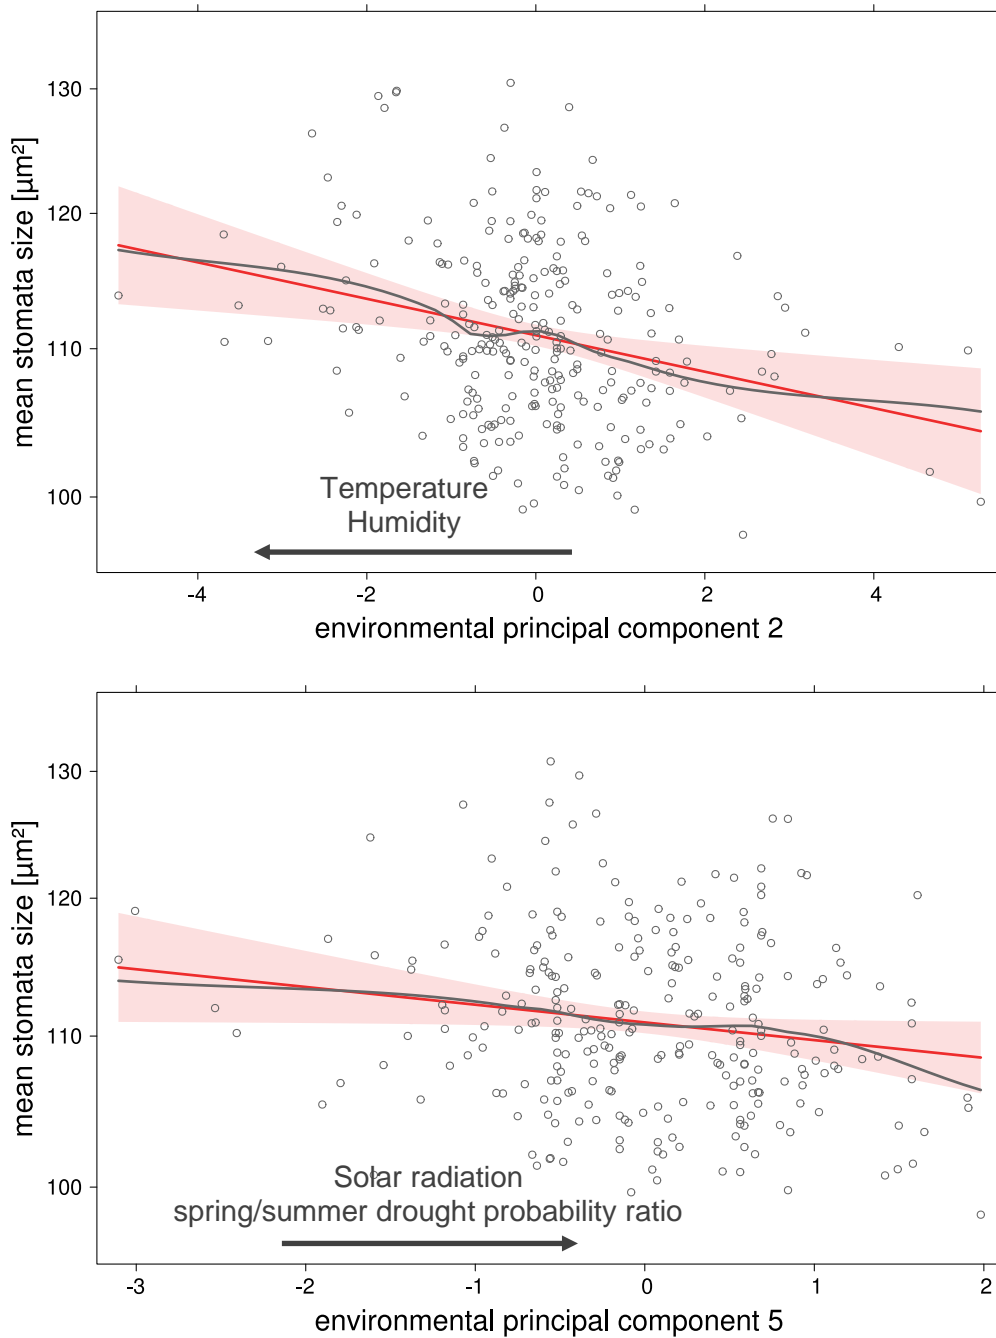

952

953 **Figure 3: Stomata patterns correlate with geographical patterns of climatic variation**

954 Correlation between stomata patterns and seven climatic principal components (PCs) was tested for  
955 each phenotype using a Generalized Linear Model (GLM) including genetic population structure as  
956 described by the 20 first genetic PCs. Plots are effect plots based on the GLM (see methods), showing  
957 the correlation between stomata size two climatic PCs. Black arrows indicate correlation with the  
958 climatic variables showing the strongest loadings for the respective PC. Plots show the linear fit (red  
959 solid line) and the smoothed fit of partial residuals (gray) of the specific predictor. Gray dots are  
960 partial residuals. The red shade shows the error of the linear fit. Both PCs shown here are significant  
961 predictors of the respective response variable ( $p < 0.05$ ).  
962

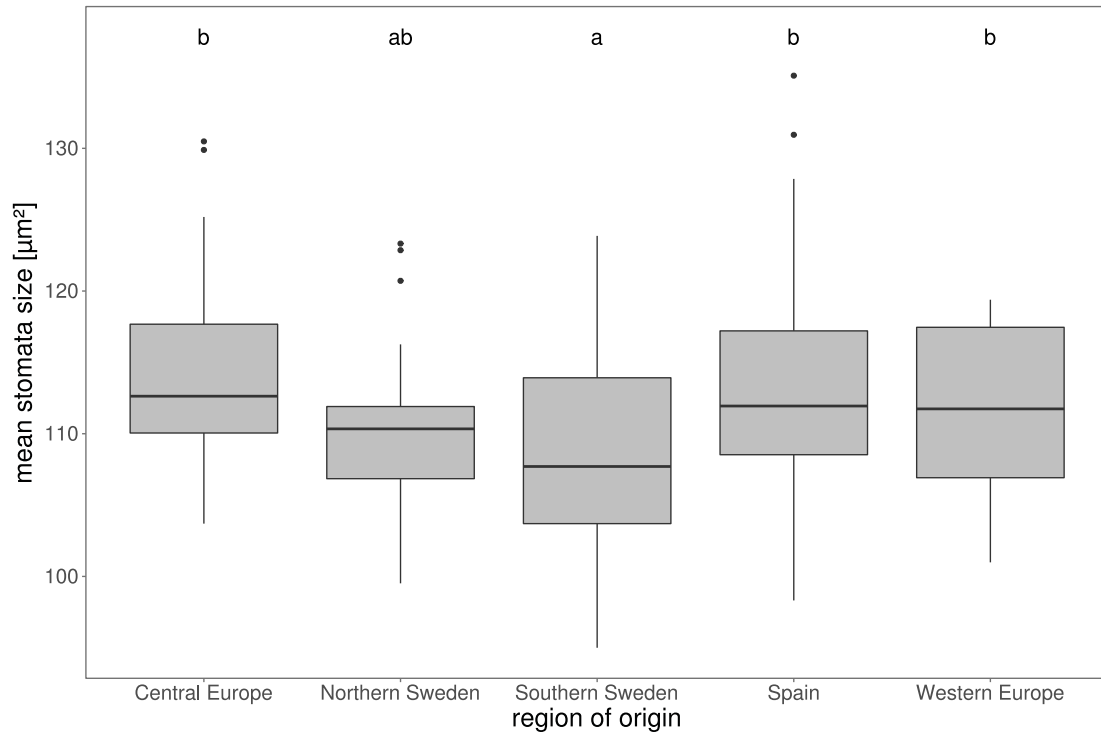

963

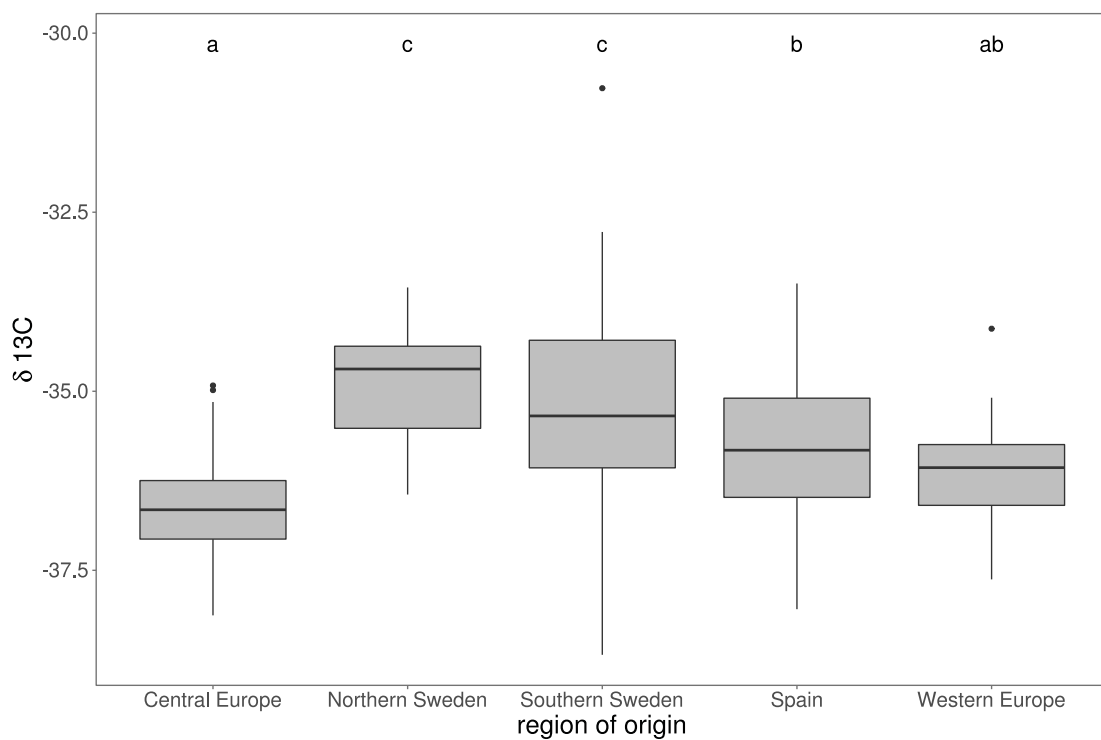

964

965 **Figure 4: Significant regional differentiation of stomata size and  $\delta^{13}\text{C}$**

966 *A. thaliana* accessions were grouped based on their geographical origin. Boxplots show regional  
967 differentiation of stomata size (top) and  $\delta^{13}\text{C}$  (bottom). Significance of differentiation was tested using  
968 Generalized Linear Models followed by a post-hoc test. Statistical significance is indicated by letters  
969 on top: Groups that do not share a common letter are significantly different. Significance levels: top)  
970 a-c, a-bc:  $p < 0.001$ ; ab-c:  $p < 0.05$ ; bottom) a-c, a-b:  $p < 0.001$ , b-c:  $p < 0.01$ , ab-c:  $p < 0.05$ .  
971

972 **A) Stomata size**

| $Q_{ST} \setminus Q_{ST}-F_{ST}$ | Central Europe | North. Sweden | South. Sweden | Spain       | West. Europe |
|----------------------------------|----------------|---------------|---------------|-------------|--------------|
| Central Europe                   |                | -0.32         | <b>0.29</b>   | -0.17       | -0.13        |
| Northern Sweden                  | 0.15           |               | -0.31         | -0.38       | -0.51        |
| Southern Sweden                  | 0.41           | 0.09          |               | <b>0.12</b> | -0.03        |
| Spain                            | 0.01           | 0.06          | 0.32          |             | -0.18        |
| West. Europe                     | 0.02           | <0.01         | 0.21          | <0.01       |              |

973

974 **B) Stomata density**

| $Q_{ST} \setminus Q_{ST}-F_{ST}$ | Central Europe | North. Sweden | South. Sweden | Spain       | West. Europe |
|----------------------------------|----------------|---------------|---------------|-------------|--------------|
| Central Europe                   |                | -0.37         | <b>0.31</b>   | -0.16       | <b>0.17</b>  |
| Northern Sweden                  | 0.09           |               | -0.24         | -0.44       | -0.49        |
| Southern Sweden                  | 0.44           | 0.16          |               | <b>0.17</b> | -0.19        |
| Spain                            | 0.01           | 0.01          | 0.36          |             | 0.07         |
| West. Europe                     | 0.32           | 0.02          | <0.01         | 0.26        |              |

975

976 **C)  $\delta^{13}C$**

| $Q_{ST} \setminus Q_{ST}-F_{ST}$ | Central Europe | North. Sweden | South. Sweden | Spain       | West. Europe |
|----------------------------------|----------------|---------------|---------------|-------------|--------------|
| Central Europe                   |                | <b>0.21</b>   | <b>0.28</b>   | <b>0.13</b> | -0.07        |
| Northern Sweden                  | 0.7            |               | -0.40         | -0.16       | -0.01        |
| Southern Sweden                  | 0.4            | 0.01          |               | -0.08       | -0.01        |
| Spain                            | 0.30           | 0.28          | 0.11          |             | -0.12        |
| West. Europe                     | 0.07           | 0.40          | 0.17          | 0.05        |              |

977

978 **Table 1 A-C: Patterns of regional differentiation depart from neutral expectations**

979 Pairwise  $Q_{ST}$  estimates were derived from linear mixed models for all regions. Genome-wide, pairwise  
 980  $F_{ST}$  distribution was calculated based on 70,000 SNPs for all regions. In the top half of each table, the  
 981 difference  $Q_{ST}-F_{ST}$  for each pair of regions is shown. In the bottom half of each table the  $Q_{ST}$  estimate  
 982 for each pair of regions is shown. Each table represents one phenotype as indicated by table headlines.  
 983 Significant  $Q_{ST}-F_{ST}$  differences are written in bold. The significance threshold is based on the 95<sup>th</sup>  
 984 percentile of a distribution of maximum  $Q_{ST}-F_{ST}$  values from 1000 random permutations of phenotypic  
 985 data.

986
